## 29 **Abstract**

30 Hypoxia Inducible Factor (HIF) is the master transcriptional regulator that orchestrates cellular  
31 adaptation to low oxygen. HIF is tightly regulated via the stability of its  $\alpha$ -subunit, which is  
32 subjected to oxygen-dependent proline hydroxylation by Prolyl-Hydroxylase Domain  
33 containing proteins (PHDs/EGLNs), and ultimately targeted for proteasomal degradation  
34 through poly-ubiquitination by von-Hippel-Lindau protein (pVHL). However, sustained HIF- $\alpha$   
35 signalling is found in many tumours independently of oxygen availability pointing towards the  
36 relevance of non-canonical HIF- $\alpha$  regulators. In this study, we establish the Ubiquitin Specific  
37 Protease 29 (USP29) as direct post-translational activator of HIF- $\alpha$  in a variety of cancer cell  
38 lines. USP29 binds to HIF- $\alpha$ , decreases poly-ubiquitination and thus protects HIF- $\alpha$  from  
39 proteasomal degradation. Deubiquitinating activity of USP29 is essential to stabilise not only  
40 HIF-1 $\alpha$  but also HIF-2 $\alpha$ , via their C-termini in an oxygen/PHD/pVHL-independent manner.  
41 Furthermore, in prostate cancer samples the expression of *USP29* correlates with the HIF-  
42 target gene *CA9* (carbonic anhydrase 9) as well as disease progression and severity.

43

44

45

46

47

48

49

50

51

52

53

54

55 **Keywords:** Cancer/Deubiquitinase/HIF/Ubiquitin/USP29

## 56 Introduction

57 Besides being an essential developmental and physiological stimulus, hypoxia is associated  
58 with pathologies such as cancer, metabolic, inflammatory, neurodegenerative and ischemic  
59 diseases. Hypoxia is indeed a feature of most human cancers (Semenza, 2012). Hence,  
60 cancer cells and their environment need to adapt to and survive under low oxygen availability.

61 The transcription factor HIF (hypoxia-inducible factor) is the central regulator of the adaptive  
62 cellular program in response to limited oxygen availability. The two HIF subunits, HIF- $\alpha$  and  
63 HIF- $\beta$  are constitutively expressed, but the stability of HIF- $\alpha$  protein is tightly regulated through  
64 the ubiquitin-proteasome system (UPS) in order to avoid inadequate HIF signalling (Huang et  
65 al, 1996). In well-oxygenated cells, HIF- $\alpha$  is hydroxylated by the oxygen sensors  
66 PHDs/EGLNs, and subsequently ubiquitinated by the ubiquitin E3-ligase von-Hippel-Lindau  
67 protein (pVHL) (Bruick & McKnight, 2001; Epstein et al, 2001; Ivan et al, 2001; Jaakkola et al,  
68 2001; Maxwell et al, 1999). Ubiquitinated HIF- $\alpha$  protein is degraded by the proteasome  
69 (Salceda & Caro, 1997). Upon hypoxia, PHDs/EGLNs activity is compromised, HIF- $\alpha$  escapes  
70 from degradation, dimerises with HIF- $\beta$ , binds to RCGTG motives (hypoxia responsive  
71 elements, HRE) within the regulatory domains of target genes and transcriptionally drives their  
72 expression (Arany et al, 1996; Wang & Semenza, 1993). HIF-targets involve among many  
73 others, genes that enhance glycolysis and metabolic rewiring, angiogenesis and resistance to  
74 apoptosis (Schodel et al, 2011). Accordingly, sustained expression of HIF- $\alpha$  in tumours has  
75 been associated with higher aggressiveness, migratory and metastasis-initiating potential and  
76 therefore worse prognosis (Trastour et al, 2007; Zhong et al, 1999). However, HIF- $\alpha$   
77 stabilisation does not always correlate with tissue oxygenation (Mayer et al, 2008).

78 Especially in the context of cancer, additional UPS related proteins have been described to  
79 be involved in the control of HIF- $\alpha$  stability (recently reviewed in (Schober & Berra, 2016)).  
80 Among those are the HIF- $\alpha$  destabilisers RACK1, MDM2, Fbw7 and CHIP that control HIF- $\alpha$   
81 stability in a non-canonical way, namely independently of O<sub>2</sub>/PHDs and/or pVHL. Of the family  
82 of deubiquitinating enzymes (DUBs), able to specifically deconjugate ubiquitin from targeted

83 proteins, USP20 (also called pVHL interacting deubiquitinating enzyme 2, VDU2), MCPIP1,  
84 USP8 and UCHL1 emerged as new HIF- $\alpha$  regulators, as they reverse the canonical HIF- $\alpha$   
85 ubiquitination. Furthermore, USP28 antagonizes Fbw7-mediated HIF-1 $\alpha$  degradation, and  
86 Cezanne (OTUD7B) protects HIF-1 $\alpha$  from lysosomal degradation, and are therefore  
87 implicated in the non-canonical HIF-1 $\alpha$  regulation (Altun et al, 2012; Bremm et al, 2014; Flugel  
88 et al, 2012; Goto et al, 2015; Li et al, 2005; Roy et al, 2013; Troilo et al, 2014). Surprisingly,  
89 to date no DUB has been shown to exhibit hydrolase activity towards HIF-2 $\alpha$ .

90 In 2000 a new gene in the Peg3 (paternally expressed gene 3) region was discovered. Like  
91 all genes in this region, it was shown to be imprinted and, in this specific case, to be paternally  
92 expressed. Due to its structural homology with the ubiquitin specific proteases (USPs), the  
93 biggest class of DUBs, it was named USP29. USP29 mRNA was only detectable by Northern  
94 Blot in murine brain and in testis of mice and humans (Kim et al, 2000). It was not until 2011  
95 that the first biological function of the 922 aa long USP29 gene product was described and  
96 showed that H<sub>2</sub>O<sub>2</sub> treatment induced the expression of USP29 (Liu et al, 2011). They reported  
97 that USP29 bound to p53 and stabilised it by decreasing its ubiquitination. A few years later,  
98 USP29 was also described to bind to the cell cycle checkpoint adapter claspin and that USP29  
99 silencing reduced basal claspin levels (Martin et al, 2015). Here, we show that USP29 is a  
100 novel non-canonical regulator of both HIF-1 $\alpha$  and HIF-2 $\alpha$ . USP29 binds to HIF- $\alpha$  in an oxygen-  
101 independent manner, deubiquitinates it and therefore rescues HIF- $\alpha$  from proteasomal  
102 degradation.

103

## 104 **Results**

### 105 **USP29 is a positive regulator of HIF-1 $\alpha$**

106 The hypoxia pathway is under exquisite control by reversible ubiquitination. In order to identify  
107 hypoxia specific deubiquitinating enzymes (DUBs), we carried out an unbiased loss-of function  
108 screen using pools of small hairpin RNAs (shRNAs) to individually inhibit the expression of 66  
109 human DUBs and the hypoxia-driven LUC reporter. USP29 came up as one of the strongest  
110 hits from three independent screenings carried out in triplicates. Indeed, the silencing of  
111 endogenous *USP29* with a pool of 3 independent shRNAs in HeLa cells significantly reduced  
112 the hypoxia-driven HRE-luciferase expression (Figure 1A). In concordance with this data,  
113 silencing of endogenous *USP29* also abrogated the hypoxic induction of the HIF target gene  
114 *CA9* (Figure 1B). The pool of shUSP29s efficiently silenced GFP-USP29 at mRNA and protein  
115 levels (Expanded View Figure 1A). Interestingly, in cells silenced for endogenous *USP29* the  
116 accumulation of HIF-1 $\alpha$  protein in hypoxia was significantly decreased and the induction of  
117 *CAIX* and *PHD2* was impaired to a similar extent as when silencing *HIF1A* (Figure 1C).  
118 Anyhow, *HIF1A* mRNA was not affected by the silencing of *USP29* (Expanded View Figure  
119 1B). More importantly, similar to the pan-hydroxylase inhibitor DMOG, the ectopic expression  
120 of USP29 led to the accumulation of endogenous HIF-1 $\alpha$ , *CAIX* and *PHD2* even in normoxia  
121 (Figure 1D). Nonetheless, *HIF1A* mRNA expression was not affected by the USP29  
122 overexpression (Expanded View Figure 1C), pointing to USP29 as a novel upstream post-  
123 translational activator of HIF-1 $\alpha$ .

### 124 **USP29 upregulates HIF-1 $\alpha$ in a non-canonical way**

125 Surprisingly, the HIF-1 $\alpha$  that accumulated in the presence of USP29 in normoxic conditions  
126 induced *PHD2* and *CAIX* (Figure 1D), albeit being prolyl-hydroxylated (Figure 2A).  
127 Furthermore, the ectopic expression of USP29 also accumulated HIF-1 $\alpha$  DM<sup>(PP/AA)</sup>, a HIF-1 $\alpha$   
128 mutant whose two oxygen-sensitive proline residues have been replaced by alanines  
129 (P402/564A), suggesting that USP29 regulates HIF-1 $\alpha$  in a non-canonical way (Figure 2B).

130 Consistently, silencing of endogenous *USP29* with 2 different siRNA sequences decreased  
131 both, HIF-1 $\alpha$  WT and HIF-1 $\alpha$  DM<sup>(PP/AA)</sup> protein levels (Figure 2C and Expanded View Figure  
132 2A). As expected, the silencing of the canonical negative regulators, *PHD2/EGLN1* and *pVHL*,  
133 only affected HIF-1 $\alpha$  WT but not HIF-1 $\alpha$  DM<sup>(PP/AA)</sup> (Figure 2C). Similarly, the overexpression  
134 of the Ub E3-ligase pVHL did only affect HIF-1 $\alpha$  WT, but not the DM protein (Expanded View  
135 Figure 2B). Taken together, these results indicate that USP29 acts on HIF-1 $\alpha$  through a non-  
136 canonical mechanism.

### 137 **Universality of USP29's effect on HIF- $\alpha$**

138 The effect of USP29 on HIF-1 $\alpha$  was observed in a variety of cell lines of different origins,  
139 including A2780 (ovarian cancer), PC3 and LnCaP (prostate cancer), SH-SY5Y and SK-N-AS  
140 (neuroblastoma) and MDA-MB-231 (breast cancer). In all tested cell lines the overexpression  
141 of USP29 led to an increase in HIF-1 $\alpha$  DM<sup>(PP/AA)</sup> levels (Figure 3A), indicating that this  
142 regulation might be a wide phenomenon. Interestingly, not only HIF-1 $\alpha$  but also both, the wild  
143 type and the oxygen-insensitive DM<sup>(PP/AA)</sup> forms of HIF-2 $\alpha$ /EPAS accumulated upon  
144 overexpression of USP29 (Figure 3B).

### 145 **USP29 stabilises HIF- $\alpha$ by protecting it from proteasomal degradation**

146 In order to determine the molecular mechanism of HIF- $\alpha$  DM<sup>(PP/AA)</sup> accumulation by USP29,  
147 we treated HEK293T cells with the proteasome inhibitor MG132 for 4 hours in the absence or  
148 presence of ectopic USP29 (Figure 4A). Both, the USP29 overexpression and the proteasome  
149 inhibition induced HIF-1 $\alpha$  DM<sup>(PP/AA)</sup> accumulation, but the lack of additivity indicated that they  
150 both acted on the same pathway. Furthermore, as USP29 accumulated HIF-1 $\alpha$  DM<sup>(PP/AA)</sup> more  
151 efficiently than MG132, we tested whether HIF-1 $\alpha$  DM<sup>(PP/AA)</sup> was also degraded via the  
152 lysosomal pathway. Yet, the inhibition of this pathway by treatment with chloroquine failed to  
153 prevent HIF-1 $\alpha$  DM<sup>(PP/AA)</sup> degradation (Expanded View Figure 3A), confirming that it requires  
154 the proteasome activity and suggesting that the difference between MG132- and USP29-  
155 induced HIF-1 $\alpha$  DM<sup>(PP/AA)</sup> accumulation was due to incomplete proteasome inhibition.

156 Cycloheximide experiments showed that USP29 increased HIF-1 $\alpha$  DM<sup>(PP/AA)</sup>'s half-life from  $\cong$   
157 1 to  $\cong$ 3 hours (Expanded View Figure 3B). More importantly, USP29 stabilised endogenous  
158 HIF-1 $\alpha$  upon reoxygenation (Figure 4B). Although USP29 did not avoid the initial HIF-1 $\alpha$   
159 degradation within the first 10 minutes of reoxygenation, thereafter HIF-1 $\alpha$  levels remained  
160 stable during at least one hour in the presence of USP29, while the protein was not longer  
161 detectable 30 minutes after reoxygenation in the absence of USP29. To gain further insight  
162 into how USP29 stabilised HIF- $\alpha$ , we generated a catalytically inactive USP29 mutant by  
163 replacing its active site cysteine residue C294 with a serine (USP29<sup>C/S</sup>). This mutation  
164 completely abrogated USP29's ability to accumulate HIF-1 $\alpha$  DM<sup>(PP/AA)</sup> (Figure 4C), pointing  
165 towards a crucial role of USP29's ubiquitin specific peptidase activity in HIF- $\alpha$  DM<sup>(PP/AA)</sup>  
166 stabilisation.

### 167 **USP29 interacts with and deubiquitinates HIF- $\alpha$ DM<sup>(PP/AA)</sup>**

168 As the catalytical activity of USPs is responsible for removal of (poly)ubiquitin chains from their  
169 target proteins, we next tested whether USP29 was able to function as a deubiquitinase for  
170 HIF- $\alpha$ . We first analysed USP29 and HIF- $\alpha$  interaction using fluorescence lifetime based FRET  
171 measurements. The fluorescence lifetime of the FRET donor, Clover-HIF-1 $\alpha$  DM<sup>(PP/AA)</sup>, was  
172 significantly decreased from  $2.86 \pm 0.02$  ns to  $2.7 \pm 0.09$  ns in the presence of the FRET  
173 acceptor mCherry-USP29 (Figure 5A). As FRET only occurs when both fluorophores are in  
174 very close proximity (around 6 nm), these data clearly show that USP29 is directly bound to  
175 HIF-1 $\alpha$  DM<sup>(PP/AA)</sup>. Similar results were obtained when we analysed the interaction between  
176 USP29 and HIF-2 $\alpha$  DM<sup>(PP/AA)</sup> (Expanded View Figure 4A). HIF-2 $\alpha$  DM<sup>(PP/AA)</sup>-GFP's lifetime was  
177 significantly reduced from  $2.39 \pm 0.01$  ns to  $2.28 \pm 0.06$  ns in the presence of the FRET  
178 acceptor mCherry-USP29. Furthermore, when GFP-tagged HIF-1 $\alpha$  DM<sup>(PP/AA)</sup> or GFP alone  
179 were immunoprecipitated from HEK293T cells, we found HA-USP29 to interact with GFP-  
180 tagged HIF-1 $\alpha$  DM<sup>(PP/AA)</sup>, but not with GFP alone (Expanded View Figure 4B). Next, we  
181 cotransfected GFP-tagged HIF-1 $\alpha$  DM<sup>(PP/AA)</sup> together with FLAG-ubiquitin either in the  
182 absence or the presence of HA-USP29 or HA-USP29<sup>C/S</sup>. After the enrichment of the

183 ubiquitinated proteome by MG132-treatment, GFP-HIF-1 $\alpha$  DM<sup>(PP/AA)</sup> was pulled-down under  
184 highly denaturing conditions and anti-FLAG-antibody was used to detect ubiquitinated GFP-  
185 HIF-1 $\alpha$  DM<sup>(PP/AA)</sup>. We found that USP29 wild type, but not the catalytically inactive USP29<sup>C/S</sup>,  
186 considerably decreased the basal ubiquitination of HIF-1 $\alpha$  DM<sup>(PP/AA)</sup> and increased the non-  
187 modified population of HIF-1 $\alpha$  DM<sup>(PP/AA)</sup> (Figure 5B). Accordingly, when silencing endogenous  
188 *USP29*, we observed increased poly-ubiquitination of HIF-1 $\alpha$  DM<sup>(PP/AA)</sup> (Figure 5C), pointing  
189 towards a basal deubiquitinating activity of endogenous USP29. Expression of a siRNA-  
190 resistant USP29 restored the basal HIF-1 $\alpha$  DM<sup>(PP/AA)</sup> ubiquitination pattern (Figure 5C right  
191 lane). Furthermore and in concordance with Fig 3B, USP29 also exerted deubiquitination  
192 activity towards HIF-2 $\alpha$  DM<sup>(PP/AA)</sup> (Expanded View Figure 4B). Taken together, our results  
193 indicate that endogenous and ectopic USP29 is an efficient deubiquitinase for HIF- $\alpha$  DM<sup>(PP/AA)</sup>  
194 thereby increasing HIF- $\alpha$  stabilisation and subsequent HIF activation.

### 195 **USP29 targets the C-terminal part of HIF- $\alpha$**

196 To identify the potential lysine residues targeted by USP29's deubiquitinating activity, we  
197 tested several truncated forms of HIF-1 $\alpha$  DM<sup>(PP/AA)</sup> for their susceptibility to USP29. The N-  
198 terminal part, HIF1 $\alpha$ DM<sup>1-657</sup>, was not affected by the presence of USP29, while the C-terminal  
199 end (HIF-1 $\alpha$ <sup>630-826</sup>) accumulated in the presence of USP29 similarly to the full-length protein  
200 (Figure 6A). The USP29<sup>C/S</sup> mutant that lacked catalytical activity was not able to accumulate  
201 HIF-1 $\alpha$ <sup>630-826</sup> (Expanded View Figure 5A). Correspondingly, USP29 acted also on the C-  
202 terminus of HIF-2 $\alpha$  (Expanded View Figure 5B). We used truncations of the C-terminus to  
203 further confine the USP29 target site within HIF-1 $\alpha$ . HIF-1 $\alpha$ <sup>630-713</sup> and HIF-1 $\alpha$ <sup>630-750</sup> were  
204 resistant to USP29-mediated accumulation (Expanded View Figure 5C) and pointed out the  
205 importance of the very C-terminal tail of HIF-1 $\alpha$  for this regulation. This tail contains two  
206 evolutionary conserved lysines (K752 and K755), which are also shared by HIF-2 $\alpha$  and a  
207 neighbouring lysine (K758) (Expanded View Figure 5D). Mutation of all three lysines to  
208 arginines (HIF-1 $\alpha$  DM<sup>KKK/RRR</sup>) conferred to this mutated protein a higher stability in



209 cycloheximide experiments (Figure 6B). Importantly, the basal ubiquitination of HIF-1 $\alpha$   
210 DM<sup>KKK/RRR</sup> was significantly reduced as compared to HIF-1 $\alpha$  DM (Figure 6C).

## 211 **USP29 levels correlate with tumour progression and HIF target gene** 212 **expression**

213 The fact that USP29 stabilises HIF- $\alpha$  and is able to maintain hypoxia signalling switched on in  
214 normoxic conditions, led us to inquire its potential function in tumour progression. We therefore  
215 assessed whether USP29 expression was altered in certain tumours. Data mining analysis of  
216 publicly available databases revealed that *USP29* expression was significantly correlated with  
217 prostate cancer progression (Figure 7A). The expression levels of *USP29* mRNA increased  
218 from normal tissue over primary tumour to metastasis. Interestingly, *USP29* expression  
219 exhibited a significant association with the Gleason Score (GS), used in the clinics to stratify  
220 prostate cancer patients and predict their prognosis, as reflected by higher GS associated with  
221 higher *USP29* expression levels (Figure 7B). Furthermore, in the prostate cancer samples the  
222 expression of *USP29* also showed a significant positive correlation with the expression levels  
223 of the HIF target gene *CA9* (Figure 7C).

224

## 225 **Discussion**

226 As the master transcription factor for hypoxia induced genes, HIF is the central component of  
227 cellular oxygen sensing. However, the pathway can be active even in the absence of hypoxia  
228 and HIF- $\alpha$  expression does not always correlate with tissue oxygenation. Notably, sustained  
229 HIF signalling occurs in many pathological conditions including cancer and inflammatory  
230 diseases pointing towards the relevance of non-canonical regulators of the HIF pathway. In  
231 the present study, we reported a novel insight into these regulatory mechanisms via USP29.  
232 We provided clear evidence that the ubiquitin specific protease 29 (USP29) is a new non-  
233 canonical and direct positive regulator of HIF- $\alpha$  stability in a panel of different cell lines. USP29  
234 bound to poly-ubiquitinated HIF- $\alpha$ , is responsible for its deubiquitination and hence protects it  
235 from proteasomal degradation. Importantly, the stabilised HIF- $\alpha$ , while still prolyl-hydroxylated,  
236 is transcriptionally active. We also showed that even the oxygen-insensitive form of HIF- $\alpha$ ,  
237 HIF- $\alpha$  DM<sup>(PP/AA)</sup>, could still be degraded by the proteasome upon poly-ubiquitination.  
238 Furthermore, USP29 is able to reverse this ubiquitination and extend the half-life of the protein.  
239 The biological significance of this deubiquitination event is exemplified by the finding that  
240 USP29 expression levels correlate with the expression of the HIF target gene *CA9*, as well as  
241 with disease progression and severity in prostate cancer samples.

242 Most studies on HIF signalling are focused on HIF-1 $\alpha$  and little is known about DUBs altering  
243 HIF-2 $\alpha$  expression in spite of the functional divergence of both isoforms (Gonzalez-Flores et  
244 al, 2014). So far there is only one report showing that Cezanne/OTUD7B indirectly regulates  
245 *EPAS1* transcript through the regulation of E2F1 expression but there is no information about  
246 DUBs regulating HIF-2 $\alpha$  stability (Moniz et al, 2015). Here we show for the first time that  
247 USP29 exhibited ubiquitin hydrolase activity towards HIF-1 $\alpha$  and also HIF-2 $\alpha$  in a similar way.

248 While a few UPS related negative and positive non-canonical regulators of HIF- $\alpha$  stability were  
249 described in the last few years (Schober & Berra, 2016), none of them has been shown to  
250 target HIF- $\alpha$  on its C-terminal end where we found USP29 to act on. We have identified a  
251 cluster of three lysine residues (K752, K755 and K758) located at the very C-terminal tail of

252 HIF-1 $\alpha$  as potential USP29 target site(s). As a matter of fact, the mutation of these residues  
253 to arginine almost completely abolished the basal ubiquitination and stabilised the mutated  
254 protein. However, we were unable to confirm by mass spectrometry that any of those lysines  
255 were indeed ubiquitinated as they weren't resolved in the analysis, even though K48-linked  
256 polyubiquitin was present in the samples. The relevant sequence context suggested that  
257 fragmented peptides were either too long or too short to be resolved by MS.

258 Our attempts to identify the ubiquitin E3 ligase that ubiquitinates HIF- $\alpha$  on those lysines and  
259 therefore counteracts USP29 function have so far been unsuccessful. Nevertheless, we  
260 hypothesise that this Ub E3 ligase might have a crucial role in triggering HIF- $\alpha$  proteasomal  
261 degradation in a prolyl-hydroxylation-independent manner and could switch HIF signalling off  
262 even in hypoxic conditions. The phosphorylation of HIF-1 $\alpha$  by ATM and PKA at S692 and  
263 S696, respectively has been suggested to increase its stability (Bullen et al, 2016; Cam et al,  
264 2010). Even though the effect of these kinases on HIF-2 $\alpha$  has not been reported, the close  
265 proximity of the serine residues to the USP29-targeted lysines make it tempting to speculate  
266 that phosphorylation might increase or decrease the binding of USP29 and the relative Ub E3  
267 ligase to HIF- $\alpha$ , respectively, and thereby determine HIF- $\alpha$ 's ubiquitination pattern and  
268 consequent stability.

269 To date, USP29 has been reported to exhibit deubiquitinase activity towards p53 and claspin,  
270 both proteins that are associated with carcinogenesis. The novel effect we now report on HIF-  
271  $\alpha$  protein levels expands the impact of USP29 in cancer. Since USP29 is involved in the  
272 regulation of key cellular processes such as HIF signalling and DNA integrity, it is not  
273 surprising to find USP29 expression to be very tightly controlled in healthy cells,  
274 transcriptionally and also potentially post-translationally. USP29, also known as HOM-TEST-  
275 84/86, is an imprinted gene located on chromosome 19q13.43 and encodes a protein of 922  
276 Aa (Kim et al., 2007). As its neighbouring gene *Peg3*, USP29's maternal allele is inactivated  
277 by imprinting and as a consequence, we and others found endogenous USP29 mRNA and  
278 protein levels barely above background by qPCR and Western Blot, respectively, using

279 commercially available antibodies for protein detection (Kim et al, 2000; Liu et al, 2011).  
280 However, the silencing of endogenous USP29 by RNAi clearly affected HIF- $\alpha$  ubiquitination,  
281 suggesting that although being scarce, USP29 was catalytically highly active. The epigenetic  
282 mechanisms that control USP29 expression and how those mechanisms are disturbed in  
283 cancer remain to be determined. For instance, LOI (loss of imprinting)-mediated activation of  
284 the normally silent maternal allele might cause the USP29 upregulation, which we found in  
285 prostate cancer relative to non-tumour tissues. Interestingly, Liu and co-workers suggested  
286 that *USP29* expression was induced upon oxidative stress (Liu et al, 2011). In their  
287 experimental setup H<sub>2</sub>O<sub>2</sub> treatment induced cooperative binding of FBP (FUSE binding  
288 protein) and AIMP2 (JTV1/p38) to *USP29*'s Far Upstream Sequence Element (FUSE), thereby  
289 triggering *USP29* transcription. Notably, AIMP2-DX2, an AIMP2 splice-variant, was  
290 particularly effective in inducing *USP29* expression (Liu et al, 2011) and high AIMP2-DX2  
291 expression has been correlated with lung cancer progression (Choi et al, 2011).

292 The identification of USP29 as an important regulator of HIF- $\alpha$  provides a novel mechanism  
293 to explain the constitutive expression of HIF- $\alpha$  reported in many tumours independently of  
294 oxygen availability. Overexpression or hyperactivity of USP29 would therefore cause  
295 sustained HIF signalling, for which we found evidence in prostate cancer. However, it remains  
296 to be confirmed whether in these tumours HIF deubiquitination is indeed abnormally regulated.  
297 Alternatively, the loss of the respective so far unknown Ub E3 ligase or the mutation of the  
298 USP29 target lysines could provide a selective advantage for tumour cells. In this regard, a  
299 thorough sequencing effort in a broad range of tumours is needed to determine whether the  
300 site that we identified is mutated in human cancers and whether mutations evolve in metastatic  
301 progression or with drug-resistance. We found the mRNA expression levels of USP29 being  
302 associated with GS in prostate cancer, which suggests that USP29 may potentially serve as  
303 a prognostic marker. Finally, our results suggest that USP29 inhibitors could be used to switch  
304 HIF signalling off as a useful strategy in combination with current chemotherapies. In this

305 context, it is worthy to note that USP29, having a cysteine protease catalytical site, is a  
306 potentially druggable protein.

307 Taken together, our study provides a rationale to make USP29 an important target for future  
308 studies. The further characterisation of the enzyme, its regulation and target proteins are  
309 crucial steps in order to understand how to tackle its deregulation.

## 310 **Materials and methods**

### 311 **Plasmids**

312 HIF-1 $\alpha$ <sup>630-826</sup> was amplified via PCR from pCMV-Myc-HIF-1 $\alpha$  and inserted into the  
313 BamHI/ApaI-digested pCMV-Myc-HIF-1 $\alpha$  vector. Green fluorescent protein-tagged HIF-1 $\alpha$   
314 DM<sup>(P402/564A)</sup> was generated by inserting the sequence of Clover (Addgene plasmid #40259)  
315 behind the myc-tag in the BamHI-digested pCMV-Myc-HIF-1 $\alpha$  DM<sup>(PP/AA)</sup> construct (Berra et al,  
316 2003) using In-Fusion HD Cloning (Clontech). Then, replacing HIF-1 $\alpha$  DM<sup>(PP/AA)</sup> with HIF-2 $\alpha$   
317 DM<sup>(PP/AA)</sup> generated green fluorescent HIF-2 $\alpha$  DM<sup>(PP/AA)</sup>. mCherry-USP29 was generated by  
318 inserting the PCR-amplified mCherry sequence (Shaner et al, 2004) between the BspEI and  
319 NheI restriction sites of GFP-USP29. HIF- $\alpha$  truncations (HIF-1 $\alpha$ <sup>630-713</sup> and HIF-1 $\alpha$ <sup>630-750</sup>) as well  
320 as HIF-1 $\alpha$  DM<sup>K752/755/758R</sup>, HIF-2 $\alpha$  DM<sup>(P405/531A)</sup>, HA-USP29 siRNA-resistant and the catalytically  
321 inactive USP29<sup>C294S</sup> were generated using the QuikChange® II XL Site-Directed Mutagenesis  
322 Kit (Stratagene) and the oligos reported in Table 1. All of the constructs were verified by  
323 sequencing. CMV- $\beta$ -galactosidase and pRE- $\Delta$ tk-Luc-HRE have been described before (Berra  
324 et al, 2003) as well as HIF-2 $\alpha$ -Myc (Tian et al, 1997). Pools of shRNAs are from Open  
325 Biosystems (pSM2c-shRNA library (Silva et al, 2005)). The FLAG-ubiquitin plasmid was a gift  
326 from (Lee et al, 2014). HA-USP29 and GFP-USP29 expression vectors were gifts from (Liu et  
327 al, 2011)

### 328 **Cell culture and transfections**

329 HEK293T cells were cultured in Dulbecco's modified Eagle medium (DMEM) supplemented  
330 with 5% FBS. HeLa and PC3 cells were cultured in DMEM supplemented with 10% FBS and  
331 SK-N-AS cells with 1% non-essential amino acids additionally. A2780 and LNCaP were  
332 cultured in RPMI supplemented with 10 % FBS, and MDA-MB-231 and SH-SY5Y cells were  
333 cultured in DMEM:F12 (1:1) supplemented with 10% FBS. Cells were incubated at 37°C at  
334 95% humidity and 5% CO<sub>2</sub>.

335 For delivery of siRNA or DNA to the cell, cells were transfected in suspension at plating or 24  
336 h post-seeding at 60–70% confluence, respectively, using Lipofectamine 2000 (Invitrogen) as  
337 a transfection reagent following manufacturer's instructions (Table 2 summarizes the sh- and  
338 siRNA sequences used in the manuscript). Incubation in hypoxia was achieved in an  
339 anaerobic workstation (*In vivo*<sub>2</sub> 400, Ruskinn) and cell lysis was performed inside the  
340 anaerobic workstation to avoid reoxygenation.

### 341 **Reporter assays and qRT-PCR**

342 Cells were lysed in 25 mM Tris phosphate pH 7.8, 8 mM MgCl<sub>2</sub>, 0.5% Triton X-100, 7.5%  
343 glycerol and 1 mM DTT. Luciferase activity measurement was performed using the Steadylite  
344 plus™ High Sensitivity Luminescence Reporter Gene Assay System (PerkinElmer). β-  
345 galactosidase activity measurement was performed using the Galacto-Light Plus system  
346 (Applied Biosystems).

347 Total RNA was isolated using the RNeasy Mini Kit (Qiagen), reverse transcribed with qScript  
348 cDNA SuperMix (Quanta Biosciences) and primer-specific amplified with the quantitative PCR  
349 MasterMix FastStart Universal SYBR Green (Roche) or the TaqMan® Universal Master Mix II  
350 when using the Universal Probe Library (Roche). The primer sequences and probes are listed  
351 in Table 3. PCR was carried out in a CFX96™ Thermal cycler (Bio-Rad). The expression of  
352 each target mRNA relative to *RPLP0* was calculated based on the threshold cycle (Ct) as  $2^{-\Delta(\Delta Ct)}$ .  
353

### 354 **Ubiquitination assay, co-immunoprecipitation and immunoblotting**

355 Ubiquitination assays were performed as described previously (Lee et al, 2014). Essentially,  
356 HEK293T cells were co-transfected with FLAG-tagged ubiquitin together with the expression  
357 vector of the GFP-tagged protein of interest. Cell were treated with MG132 (10 μM) for 2h prior  
358 to lysis with lysis buffer (50 mM Tris-HCl pH 7.5, 150 mM NaCl, 1 mM EDTA, 0.5% Triton X-  
359 100, 40 mM β-Glycerolphosphate, 1 μg/ml Leupeptin, 1 μg/ml Aprotinin, 1 μg/ml Pepstatin A,  
360 7 mg/ml N-ethylmaleimide (NEM)). Precleared lysates were incubated for 2.5h at RT with pre-

361 washed GFP-traps® (Chromotek) and subsequently subjected to stringent washes in  
362 denaturing conditions (8 M urea, 1% SDS). Protein was eluted by boiling at 95°C for 5 min  
363 (250 mM Tris-HCl pH 7.5, 40% glycerol, 4% SDS, 0.2% bromophenol blue, 5%  $\beta$ -  
364 mercaptoethanol) and migrated on 4-15% Tris-glycine gradient gels (BioRad).

365 Co-immunoprecipitation assays were performed as ubiquitination assays but cells were lysed  
366 in the absence of NEM (50 mM Tris-HCl (pH 8), 120 mM NaCl, 1 mM EDTA, 1 % IGEPAL CA-  
367 630, 40 mM  $\beta$ -Glycerolphosphate, 1  $\mu$ g/ml Leupeptin, 1  $\mu$ g/ml Aprotinin, 1  $\mu$ g/ml Pepstatin A).  
368 Lysates were precleared by incubating with agarose beads (Chromotek) prior to overnight  
369 incubation with the GFP-traps® and mild washes were performed with detergent-free non-  
370 denaturing lysis buffer. Protein complexes were eluted and migrated as described above.

371 For total cell extracts, cells were lysed with Laemmli buffer (50 mM Tris-HCl pH 6.8, 1.25%  
372 SDS, 15% glycerol) and total protein was quantified using the Lowry assay. Proteins were  
373 separated by SDS-PAGE and transferred onto a PVDF membrane (Millipore). The following  
374 antibodies were used for immunoblotting: mouse anti- $\beta$ -actin (A5441, Sigma-Aldrich), mouse  
375 anti-CAIX (clone MN75, Bayer), mouse anti-FLAG-HRP (F3165, Sigma-Aldrich), mouse anti-  
376 GFP (11814460001, Roche), mouse anti-HA.11 (MMS-101R, Covance), rabbit anti-HIF-  
377 P564OH (D43B5, Cell Signaling Technology), anti-LC3 (2775s, Cell Signaling Technology),  
378 mouse anti-myc (9B11, Cell Signalling Technology). Home made rabbit anti-HIF1 $\alpha$  and anti-  
379 PHD2 antibodies have been previously described (Berra et al, 2003). Immunoreactive bands  
380 were visualized with ECL.

## 381 **FLIM-FRET**

382 Fluorescence lifetime images were acquired by scanning the sample with the LSM780 (Zeiss)  
383 scan head unidirectional and without averaging, recording a frame of 256 x 255 pixel with a  
384 pixel dwell time of 25.21  $\mu$ s. Excitation of the green-fluorescent donor fluorophore was  
385 controlled by the PDL 828 "Sepia II" unit (PicoQuant) operating the 485 nm pulsed diode laser  
386 (PicoQuant) with a repetition rate of 40 MHz. The objective used was a C-Apochromat 40x/1.2



387 W Corr M27 (Zeiss). Fluorescence emission was collected through a 520/535 nm bandpass  
388 filter onto the Hybrid Detector PMA 40 (PicoQuant). Exact time between laser excitation and  
389 photon arrival was recorded by the Time-correlated single photon counting device (TCSPC)  
390 TimeHarp260 (PicoQuant) and plotted in a histogram, thereby building up a fluorescence  
391 decay curve. An instrument response function (IRF) using erythrosine B was recorded in the  
392 same measurement conditions on an everyday basis as described previously (Szabelski et al,  
393 2009). SymPhoTime 64 software (PicoQuant) controlled all PicoQuant hardware devices and  
394 was used for analysis. All photons within the region of interest were included in lifetime fitting  
395 analysis. The TCSPC-curve was reconvoluted with the IRF and fitted to a two-component  
396 decay curve to extract average lifetimes  $T_{Av Int}$ .

### 397 **Bioinformatics analysis and statistics**

398 Bioinformatic patients analyses were performed as reported (Torrano et al. 2016). Data was  
399 retrieved from (Taylor et al, 2010). These data have been subjected to background correction,  
400 log<sub>2</sub> transformation and quartile normalisation. For the comparison of gene expression levels  
401 between different pathophysiological status, normal distribution and variances were analysed  
402 and a parametric ANOVA test was applied. For correlations analysis, a Pearson correlation  
403 test was applied. Pearson's coefficient (R) indicates the existing linear correlation  
404 (dependence) between two variables X and Y, giving a value between +1 and -1 (both  
405 included), where 1 is total positive correlation, 0 is no correlation, and -1 is total negative  
406 correlation. The p-value indicates the significance of this R coefficient. The confidence level  
407 used in this case was also of 95% (alpha value = 0.05).

408 A minimum number of three independent experiments were performed. Data represent mean  
409  $\pm$  s.e.m. of pooled experiments with the exception of the western blots that correspond to a  
410 representative replicate. For data mining analysis, ANOVA test was used for multi-component  
411 comparisons and Student *T* test or Mann Whitney *U* test for two-group parametric or non-  
412 parametric comparisons, respectively. The confidence level used for all the statistical analyses  
413 was of 0.95 (alpha value = 0.05).

## 415 **Acknowledgements**

416 We would like to thank Dr Russell and Dr Levens for kindly providing the original HIF-2 $\alpha$  and  
417 USP29 plasmids, respectively. EB's lab is supported by the Basque Department of Industry,  
418 Tourism and Trade (Etortek) and Education (PI2010/16), and the MINECO (BFU2013-46647-  
419 R and BFU2016-76872-R) grants. ASS is a recipient of a UoL-CIC bioGUNE PhD studentship.  
420 TMM is supported by the MINECO FPI fellowship (BES-2014-070406). An ERC Starting grant  
421 (336343) supports AC's lab and UM is a recipient of a MINECO grant (SAF2013-44782-P).  
422 We thank the Centre for Cell Imaging (CCI) for technical support. CCI equipment was funded  
423 by the MRC (MR/K015931/1). The authors declare that they have no conflict of interests.

## 424 **Author contributions**

425 ASS designed and performed experiments and contributed to the analysis of the data and the  
426 writing of the manuscript. IMB, TMM, EPA, OC and SP performed experiments. ARC, AMA  
427 and AC carried out the bioinformatic and biostatistical analysis and contributed to the  
428 discussion of the results. UM and VS provided technical support and contributed to the critical  
429 discussion of the results and manuscript revision. EB designed and supervised the project,  
430 analysed data and wrote the manuscript.

## 431 **Conflicts of interest**

432 The authors declare that they have no conflict of interests.

433

## 434 **References**

- 435 Altun M, Zhao B, Velasco K, Liu H, Hassink G, Paschke J, Pereira T, Lindsten K (2012)  
436 Ubiquitin-specific protease 19 (USP19) regulates hypoxia-inducible factor 1 $\alpha$  (HIF-1 $\alpha$ ) during  
437 hypoxia. *The Journal of biological chemistry* **287**: 1962-1969
- 438 Arany Z, Huang LE, Eckner R, Bhattacharya S, Jiang C, Goldberg MA, Bunn HF, Livingston  
439 DM (1996) An essential role for p300/CBP in the cellular response to hypoxia. *Proceedings of*  
440 *the National Academy of Sciences of the United States of America* **93**: 12969-12973
- 441 Berra E, Benizri E, Ginouves A, Volmat V, Roux D, Pouyssegur J (2003) HIF prolyl-  
442 hydroxylase 2 is the key oxygen sensor setting low steady-state levels of HIF-1 $\alpha$  in  
443 normoxia. *EMBO J* **22**: 4082-4090
- 444 Bremm A, Moniz S, Mader J, Rocha S, Komander D (2014) Cezanne (OTUD7B) regulates  
445 HIF-1 $\alpha$  homeostasis in a proteasome-independent manner. *EMBO reports* **15**: 1268-1277
- 446 Bruick RK, McKnight SL (2001) A conserved family of prolyl-4-hydroxylases that modify HIF.  
447 *Science* **294**: 1337-1340
- 448 Bullen JW, Tchernyshyov I, Holewinski RJ, DeVine L, Wu F, Venkatraman V, Kass DL, Cole  
449 RN, Van Eyk J, Semenza GL (2016) Protein kinase A-dependent phosphorylation stimulates  
450 the transcriptional activity of hypoxia-inducible factor 1. *Science signaling* **9**: ra56
- 451 Cam H, Easton JB, High A, Houghton PJ (2010) mTORC1 signaling under hypoxic conditions  
452 is controlled by ATM-dependent phosphorylation of HIF-1 $\alpha$ . *Molecular cell* **40**: 509-520
- 453 Choi JW, Kim DG, Lee AE, Kim HR, Lee JY, Kwon NH, Shin YK, Hwang SK, Chang SH, Cho  
454 MH, Choi YL, Kim J, Oh SH, Kim B, Kim SY, Jeon HS, Park JY, Kang HP, Park BJ, Han JM,  
455 Kim S (2011) Cancer-associated splicing variant of tumor suppressor AIMP2/p38: pathological  
456 implication in tumorigenesis. *PLoS genetics* **7**: e1001351
- 457 Epstein AC, Gleadle JM, McNeill LA, Hewitson KS, O'Rourke J, Mole DR, Mukherji M, Metzen  
458 E, Wilson MI, Dhanda A, Tian YM, Masson N, Hamilton DL, Jaakkola P, Barstead R, Hodgkin  
459 J, Maxwell PH, Pugh CW, Schofield CJ, Ratcliffe PJ (2001) *C. elegans* EGL-9 and mammalian  
460 homologs define a family of dioxygenases that regulate HIF by prolyl hydroxylation. *Cell* **107**:  
461 43-54
- 462 Flugel D, Gorchach A, Kietzmann T (2012) GSK-3 $\beta$  regulates cell growth, migration, and  
463 angiogenesis via Fbw7 and USP28-dependent degradation of HIF-1 $\alpha$ . *Blood* **119**: 1292-  
464 1301

- 465 Gonzalez-Flores A, Aguilar-Quesada R, Siles E, Pozo S, Rodriguez-Lara MI, Lopez-Jimenez  
466 L, Lopez-Rodriguez M, Peralta-Leal A, Villar D, Martin-Oliva D, del Peso L, Berra E, Oliver FJ  
467 (2014) Interaction between PARP-1 and HIF-2alpha in the hypoxic response. *Oncogene* **33**:  
468 891-898
- 469 Goto Y, Zeng L, Yeom CJ, Zhu Y, Morinibu A, Shinomiya K, Kobayashi M, Hirota K, Itasaka  
470 S, Yoshimura M, Tanimoto K, Torii M, Sowa T, Menju T, Sonobe M, Takeya H, Toi M, Date  
471 H, Hammond EM, Hiraoka M, Harada H (2015) UCHL1 provides diagnostic and antimetastatic  
472 strategies due to its deubiquitinating effect on HIF-1alpha. *Nature communications* **6**: 6153
- 473 Huang LE, Arany Z, Livingston DM, Bunn HF (1996) Activation of hypoxia-inducible  
474 transcription factor depends primarily upon redox-sensitive stabilization of its alpha subunit. *J*  
475 *Biol Chem* **271**: 32253-32259
- 476 Ivan M, Kondo K, Yang H, Kim W, Valiando J, Ohh M, Salic A, Asara JM, Lane WS, Kaelin  
477 WG, Jr. (2001) HIFalpha targeted for VHL-mediated destruction by proline hydroxylation:  
478 implications for O2 sensing. *Science* **292**: 464-468
- 479 Jaakkola P, Mole DR, Tian YM, Wilson MI, Gielbert J, Gaskell SJ, von Kriegsheim A,  
480 Hebestreit HF, Mukherji M, Schofield CJ, Maxwell PH, Pugh CW, Ratcliffe PJ (2001) Targeting  
481 of HIF-alpha to the von Hippel-Lindau ubiquitylation complex by O2-regulated prolyl  
482 hydroxylation. *Science (New York, NY)* **292**: 468-472
- 483 Kim J, Noskov VN, Lu X, Bergmann A, Ren X, Warth T, Richardson P, Kouprina N, Stubbs L  
484 (2000) Discovery of a novel, paternally expressed ubiquitin-specific processing protease gene  
485 through comparative analysis of an imprinted region of mouse chromosome 7 and human  
486 chromosome 19q13.4. *Genome Res* **10**: 1138-1147
- 487 Lee SY, Ramirez J, Franco M, Lectez B, Gonzalez M, Barrio R, Mayor U (2014) Ube3a, the  
488 E3 ubiquitin ligase causing Angelman syndrome and linked to autism, regulates protein  
489 homeostasis through the proteasomal shuttle Rpn10. *Cellular and molecular life sciences* :  
490 *CMLS* **71**: 2747-2758
- 491 Li Z, Wang D, Messing EM, Wu G (2005) VHL protein-interacting deubiquitinating enzyme 2  
492 deubiquitinates and stabilizes HIF-1alpha. *EMBO reports* **6**: 373-378
- 493 Liu J, Chung H-J, Vogt M, Jin Y, Malide D, He L, Dundr M, Levens D (2011) JTV1 co-activates  
494 FBP to induce USP29 transcription and stabilize p53 in response to oxidative stress. *The*  
495 *EMBO journal* **30**: 846-858

- 496 Martin Y, Cabrera E, Amoedo H, Hernandez-Perez S, Dominguez-Kelly R, Freire R (2015)  
497 USP29 controls the stability of checkpoint adaptor Claspin by deubiquitination. *Oncogene* **34**:  
498 1058-1063
- 499 Maxwell PH, Wiesener MS, Chang GW, Clifford SC, Vaux EC, Cockman ME, Wykoff CC,  
500 Pugh CW, Maher ER, Ratcliffe PJ (1999) The tumour suppressor protein VHL targets hypoxia-  
501 inducible factors for oxygen-dependent proteolysis. *Nature* **399**: 271-275
- 502 Mayer A, Hockel M, Vaupel P (2008) Endogenous hypoxia markers: case not proven!  
503 *Advances in experimental medicine and biology* **614**: 127-136
- 504 Moniz S, Bandarra D, Biddlestone J, Campbell KJ, Komander D, Bremm A, Rocha S (2015)  
505 Cezanne regulates E2F1-dependent HIF2alpha expression. *Journal of cell science* **128**: 3082-  
506 3093
- 507 Roy A, Zhang M, Saad Y, Kolattukudy PE (2013) Antidicer RNase activity of monocyte  
508 chemotactic protein-induced protein-1 is critical for inducing angiogenesis. *American journal*  
509 *of physiology Cell physiology* **305**: C1021-1032
- 510 Salceda S, Caro J (1997) Hypoxia-inducible factor 1alpha (HIF-1alpha) protein is rapidly  
511 degraded by the ubiquitin-proteasome system under normoxic conditions. Its stabilization by  
512 hypoxia depends on redox-induced changes. *J Biol Chem* **272**: 22642-22647
- 513 Schober AS, Berra E (2016) DUBs, New Members in the Hypoxia Signaling cUb. *Frontiers in*  
514 *oncology* **6**: 53
- 515 Schodel J, Oikonomopoulos S, Ragoussis J, Pugh CW, Ratcliffe PJ, Mole DR (2011) High-  
516 resolution genome-wide mapping of HIF-binding sites by CHIP-seq. *Blood* **117**: e207-217
- 517 Semenza GL (2012) Hypoxia-inducible factors: mediators of cancer progression and targets  
518 for cancer therapy. *Trends in pharmacological sciences* **33**: 207-214
- 519 Shaner NC, Campbell RE, Steinbach PA, Giepmans BN, Palmer AE, Tsien RY (2004)  
520 Improved monomeric red, orange and yellow fluorescent proteins derived from *Discosoma* sp.  
521 red fluorescent protein. *Nature biotechnology* **22**: 1567-1572
- 522 Silva JM, Li MZ, Chang K, Ge W, Golding MC, Rickles RJ, Siolas D, Hu G, Paddison PJ,  
523 Schlabach MR, Sheth N, Bradshaw J, Burchard J, Kulkarni A, Cavet G, Sachidanandam R,  
524 McCombie WR, Cleary MA, Elledge SJ, Hannon GJ (2005) Second-generation shRNA  
525 libraries covering the mouse and human genomes. *Nature genetics* **37**: 1281-1288

- 526 Szabelski M, Ilijev D, Sarkar P, Luchowski R, Gryczynski Z, Kapusta P, Erdmann R,  
527 Gryczynski I (2009) Collisional quenching of erythrosine B as a potential reference dye for  
528 impulse response function evaluation. *Applied spectroscopy* **63**: 363-368
- 529 Taylor BS, Schultz N, Hieronymus H, Gopalan A, Xiao Y, Carver BS, Arora VK, Kaushik P,  
530 Cerami E, Reva B, Antipin Y, Mitsiades N, Landers T, Dolgalev I, Major JE, Wilson M, Socci  
531 ND, Lash AE, Heguy A, Eastham JA, Scher HI, Reuter VE, Scardino PT, Sander C, Sawyers  
532 CL, Gerald WL (2010) Integrative genomic profiling of human prostate cancer. *Cancer cell* **18**:  
533 11-22
- 534 Tian H, McKnight SL, Russell DW (1997) Endothelial PAS domain protein 1 (EPAS1), a  
535 transcription factor selectively expressed in endothelial cells. *Genes & development* **11**: 72-  
536 82
- 537 Trastour C, Benizri E, Ettore F, Ramaioli A, Chamorey E, Pouyssegur J, Berra E (2007) HIF-  
538 1alpha and CA IX staining in invasive breast carcinomas: prognosis and treatment outcome.  
539 *International journal of cancer Journal international du cancer* **120**: 1451-1458
- 540 Troilo A, Alexander I, Muehl S, Jaramillo D, Knobloch K-P, Krek W (2014) HIF1 $\alpha$   
541 deubiquitination by USP8 is essential for ciliogenesis in normoxia. *EMBO reports* **15**: 77-85
- 542 Wang GL, Semenza GL (1993) General involvement of hypoxia-inducible factor 1 in  
543 transcriptional response to hypoxia. *Proceedings of the National Academy of Sciences of the*  
544 *United States of America* **90**: 4304-4308
- 545 Zhong H, De Marzo AM, Laughner E, Lim M, Hilton DA, Zagzag D, Buechler P, Isaacs WB,  
546 Semenza GL, Simons JW (1999) Overexpression of hypoxia-inducible factor 1alpha in  
547 common human cancers and their metastases. *Cancer research* **59**: 5830-5835

548 **Tables**

549 Table 1: Oligo sequences for cloning and mutagenesis of HIF- $\alpha$  and USP29 plasmids

| <b>PCR amplification</b>                        | <b>Oligos (5'-3')</b>                                                                                    |
|-------------------------------------------------|----------------------------------------------------------------------------------------------------------|
| HIF-1 $\alpha$ <sup>630-826</sup>               | F: ATGGGATCCGACCGTATGGAAGA<br>R: CATGGGCCCTCAGTAACTTGATCC                                                |
| Clover for HIF-1 $\alpha$ DM <sup>(PP/AA)</sup> | F: GATCTGAGCCCGGGCGGAGTGAGCAAGGGCGAGGAGCTG<br>R: GGAATTCCGGGGATCCCTTGTACAGCTCGTCCATGCCATG                |
| HIF-2 $\alpha$ DM <sup>(PP/AA)</sup>            | F: ACGAGCTGTACAAGGGAACAGCTGACAAGGAGAAGAAAAG<br>R: TTAATTAAGGTACCGCGGTGGCCTGGTCCAGGGC                     |
| mCherry for USP29                               | F: GAACCGTCAGATCCGCCACCATGGTGAGCAAGGGCGAG<br>R: CTCGAGATCTGAGTCCGGACTTGTACAGCTCGTCCATGCCGC               |
| <b>Mutagenesis</b>                              | <b>Oligos (5'-3')</b>                                                                                    |
| HIF-1 $\alpha$ <sup>630-713</sup>               | F: CCAAAGATACTAGCTTTGTAGAATGCTCAGAGAAAGCGAAAAATG<br>R: CATTTTTTCGCTTTTCTCTGAGCATTCTACAAAGCTAGTATCTTTGG   |
| HIF-1 $\alpha$ <sup>630-750</sup>               | F: CATGCAGCTACTACATCACTTTGATGGAAACGTGTAAGAGGATG<br>R: CATCCTTTTACACGTTTCCATCAAAGTGATGTAGTAGCTGCATG       |
| HIF-1 $\alpha$ <sup>K752/755/758R</sup>         | F: CATCACTTTCTTGGAGACGTGTAAGAGGATGTAGATCTAGTGAACAG<br>R: CTGTTCACTAGATCTACATCCTCTTACACGTCTCCAAGAAAGTGATG |
| HIF-2 $\alpha$ <sup>P405A</sup>                 | F: CAATGAGCTGGACCTCGAGACACTGGCAGCCTATATCCCCATG<br>R: CATGGGGATATAGGCTGCCAGTGTCTCGAGGTCCAGCTCATTG         |
| HIF-2 $\alpha$ <sup>P531A</sup>                 | F: GAGGAGCTGGCCCAGCTAGCTGCCACCCCAGGAGACGCC<br>R: GCGTCTCCTGGGGTGGCAGCTAGCTGGGCCAGCTCCTC                  |
| USP29 <sup>C294S</sup>                          | F: CCCCAATTTGGGAAACACCAGTTACATGAATGCAGTTTTAC<br>R: GTAAACTGCATTCATGTAAGTGGTGTTCCTCCAAATTGGGG             |

|                       |                                                                                                           |
|-----------------------|-----------------------------------------------------------------------------------------------------------|
| USP29 siRNA resistant | F: GAAAGCAGGAATATGCTCAAAGAGATTGACAAAACCTTCATTTTACGC<br>R: GCGTAAAATGAAGTTTTGTCAATCTCTTTGAGCATATTCCTGCTTTC |
|-----------------------|-----------------------------------------------------------------------------------------------------------|

550

551 Table 2: Sequences of shRNAs and siRNAs

|                         | Sequence (5'-3')          |
|-------------------------|---------------------------|
| shControl               | CATCATCGATCGGGGATGTAGG    |
| shHIF-1 $\alpha$        | TCCTGTGGTGACTTGTCTT       |
| shUSP29.1 (v2HS_200524) | TTGATCTCAGAAATCATCTCCT    |
| shUSP29.2 (v2HS_250889) | TTTCCAGATTTGAAAGTGACCA    |
| shUSP29.3 (v2HS_254186) | ATATTTCTTGTTTGGTACAGGG    |
| siControl               | CCUACAUCCCGAUCGAUGAUGdTdT |
| siHIF-1 $\alpha$        | AAAGGACAAGUCACCACAGGAdTdT |
| siUSP29#1               | GGAAUAUGCUGAAGGAAAUdTdT   |
| siUSP29#2               | GGUCACUUUCAAUCUGGAdTdT    |
| siPHD2                  | CUUCAGAUUCGGUCGGUAAAGdTdT |
| siVHL                   | GGAGCGCAUUGCACAUCAACGdTdT |

552

553 Table 3: Sequences of primers and probes for qPCR

| gene         | primer (5'-3')                                         | TaqMan® probe |
|--------------|--------------------------------------------------------|---------------|
| <i>HIF1A</i> | F:TCAAGCAGTAGGAATTGGA<br>R: CGATCATGCAGCTACTACATCAC    | #66           |
| <i>USP29</i> | F:GGATCTCAAGGAATGGCTGA<br>R: TTCATCTATGATGCTCTCCTCAAT  | #28           |
| <i>RPLP0</i> | F: TCTACAACCCTGAAGTGCTTGAT<br>R: CAATCTGCAGACAGACACTGG | #6            |



|              |                                                         |      |
|--------------|---------------------------------------------------------|------|
| <i>CA9</i>   | F: GAAAACAGTGCCTATGAGCAGTTG<br>R: TCCTGGGACCTGAGTCTCTGA | SYBR |
| <i>RPLP0</i> | F: CAGATTGGCTACCCAAGTGT<br>R: GGCCAGGACTCGTTTGTACC      | SYBR |

554

## 555 **Figure legends**

### 556 **Figure 1. USP29 is a positive regulator of HIF-1 $\alpha$ .**

557 **A** HeLa cells were silenced with scrambled or shRNAs targeting *HIF1A* and *USP29* and  
558 transfected with a reporter vector (pRE- $\Delta$ tk-Luc) containing three copies of the HRE from the  
559 erythropoietin gene and CMV- $\beta$ -gal to normalize for transfection efficiency. Cells were  
560 incubated for 16 h in normoxia (21% O<sub>2</sub>) or hypoxia (1% O<sub>2</sub>) and luciferase and  $\beta$ -  
561 galactosidase activities were measured.

562 **B** HeLa cells were treated as in A and total RNA was extracted, reverse-transcribed and  
563 expression of *CA9* was determined by qPCR.

564 **C** Whole cell extracts (WCE) from HeLa cells treated as in A were subjected to SDS-PAGE  
565 followed by immunoblotting with the indicated antibodies.

566 **D** HEK293T cells were transfected with empty vector or HA-USP29 and left untreated or  
567 treated with DMOG for 4 hours prior to lysis. WCE were subjected to SDS-PAGE and  
568 immunoblotting was performed using the indicated antibodies.

### 569 **Figure 2. USP29 regulates HIF-1 $\alpha$ in a non-canonical way.**

570 **A** HEK293T cells were transfected with empty vector or HA-USP29 and treated with the  
571 hypoxia mimetic DMOG (1 mM), the proteasome inhibitor MG132 (10  $\mu$ M) or hypoxia (1% O<sub>2</sub>)  
572 for 4 hours. WCE were prepared and analysed by immunoblotting with the indicated  
573 antibodies.

574 **B** HEK293T cells were co-transfected with myc-HIF-1 $\alpha$  or myc-HIF-1 $\alpha$  DM<sup>(PP/AA)</sup> and empty  
575 vector or GFP-USP29. Levels of myc- and GFP-tagged proteins in WCE were determined by  
576 immunoblotting in WCE.

577 **C** HEK293T cells were silenced with control or siRNAs (20 nM) targeting endogenous *USP29*,  
578 *PHD2/EGLN1* or *pVHL* mRNA and transfected with myc-HIF-1 $\alpha$  or myc-HIF-1 $\alpha$  DM<sup>(PP/AA)</sup>. Total  
579 cell extracts were subjected to SDS-PAGE followed by immunoblotting with the indicated  
580 antibodies.

581 **Figure 3. Wide impact of USP29 on HIF- $\alpha$ .**

582 **A** Cancer cell lines of different origins were co-transfected with myc-HIF-1 $\alpha$  DM<sup>(PP/AA)</sup> and  
583 empty vector or HA-USP29 and left untreated or treated with the proteasome inhibitor MG132  
584 (10  $\mu$ M) for 4 hours. WCE were subjected to SDS-PAGE followed by immunoblotting with the  
585 indicated antibodies. **B** HEK293T cells were co-transfected with myc-HIF-2 $\alpha$  or myc-HIF-2 $\alpha$   
586 DM<sup>(PP/AA)</sup> and empty vector or GFP-USP29 and total cell extracts were analysed by  
587 immunoblotting.

588 **Figure 4. USP29 stabilises HIF-1 $\alpha$  by protecting it from proteasome-mediated**

589 **degradation.** **A** HEK293T cells were co-transfected with myc-HIF-1 $\alpha$  DM<sup>(PP/AA)</sup> and empty  
590 vector or GFP-USP29 and left untreated or treated with the proteasome inhibitor MG132 (10  
591  $\mu$ M) for 4 hours. Total cell extracts were subjected to SDS-PAGE followed by immunoblotting  
592 with the indicated antibodies.

593 **B** HEK293T cells were transfected with empty vector or GFP-USP29 and incubated in hypoxia  
594 (1% O<sub>2</sub>) for 4 hours. Then cells were treated with cycloheximide (20  $\mu$ g/ml) to inhibit protein  
595 synthesis, reoxygenated and cell extracts were prepared at the indicated time points. HIF-1 $\alpha$   
596 protein levels were determined by Western Blotting.

597 **C** HEK293T cells were co-transfected with myc-HIF-1 $\alpha$  DM<sup>(PP/AA)</sup> and empty vector, GFP-  
598 USP29 or GFP-USP29<sup>C/S</sup>. Cell extracts were subjected to immunoblotting with the indicated  
599 antibodies.

600 **Figure 5. USP29 deubiquitinates HIF- $\alpha$  DM<sup>(PP/AA)</sup>.**

601 **A** HeLa cells were transfected with the FRET donor Clover- HIF-1 $\alpha$  DM<sup>(PP/AA)</sup> alone or together  
602 with the FRET acceptor mCherry-USP29. Fluorescence images for donor (green) and  
603 acceptor (red) channel were acquired (left and central panel). The lifetime of the donor was  
604 measured and pseudo-colour coded fluorescence life time images (FLIM) were generated.  
605 From 3 independent experiments average lifetimes of the donor in the absence (n = 34) and  
606 the presence (n = 25) of the FRET acceptor were calculated. Scale bars are 10  $\mu$ m long, (\*) p  
607 = 1.32\*10<sup>-8</sup>.

608 **B** HEK293T cells were co-transfected with GFP-HIF-1 $\alpha$  DM<sup>(PP/AA)</sup>, FLAG-ubiquitin and either  
609 HA-USP29 or HA-USP29<sup>C/S</sup>. Cells were treated with the proteasome inhibitor MG132 (10  $\mu$ M)  
610 for 2 hours and lysed in the presence of the DUB inhibitor NEM. GFP-HIF-1 $\alpha$  DM<sup>(PP/AA)</sup> was  
611 pulled down with GFP-traps® and subjected to stringent washes (8 M urea, 1% SDS).  
612 Ubiquitinated and non-ubiquitinated GFP-HIF-1 $\alpha$  DM<sup>(PP/AA)</sup> protein in the eluate was analysed  
613 by immunoblotting with anti-FLAG and anti-GFP antibodies, respectively.

614 **C** HEK293T cells were silenced with a control or a siRNA targeting *USP29* (20 nM) and co-  
615 transfected with GFP-HIF-1 $\alpha$  DM<sup>(PP/AA)</sup>, FLAG-ubiquitin and either empty vector or siRNA-  
616 resistant HA-USP29. Treatment of cells, pull-down with GFP-traps® and subsequent analysis  
617 of the ubiquitinated and non-ubiquitinated GFP-HIF-1 $\alpha$  DM<sup>(PP/AA)</sup> protein in the eluate were  
618 performed as in B.

619 **Figure 6. USP29 targets the C-terminal part of HIF- $\alpha$ .**

620 **A** HEK293T cells were co-transfected with myc-HIF-1 $\alpha$  DM<sup>1-826</sup>, myc-HIF-1 $\alpha$  DM<sup>1-657</sup> or myc-  
621 HIF-1 $\alpha$  DM<sup>630-826</sup> and either empty vector or GFP-USP29. Whole cell extracts were subjected  
622 to SDS-PAGE followed by immunoblotting with the indicated antibodies.

623 **B** HEK293T cells were transfected with myc-HIF-1 $\alpha$  DM or myc-HIF-1 $\alpha$  DM<sup>KKK/RRR</sup> and cells  
624 were treated with cycloheximide (CHX) (20  $\mu$ g/ml) to inhibit protein synthesis. Cell extracts

625 were collected at the indicated times after CHX treatment and protein levels of the myc-tagged  
626 HIF-1 $\alpha$  DM<sup>(PP/AA)</sup> proteins were analysed by western blot.

627 **C** HEK293T cells were co-transfected with GFP-HIF-1 $\alpha$  DM or myc-HIF-1 $\alpha$  DM<sup>KKK/RRR</sup> and  
628 FLAG-ubiquitin. Cells were treated with the proteasome inhibitor MG132 (10  $\mu$ M) for 2 hours  
629 and lysed in the presence of the DUB inhibitor NEM. GFP-tagged protein was pulled down  
630 with GFP-traps® and subjected to stringent washes (8 M urea, 1% SDS). Ubiquitinated and  
631 non-ubiquitinated GFP-HIF-1 $\alpha$  protein in the eluate was analysed by immunoblotting with anti-  
632 FLAG and anti-GFP antibodies, respectively.

633 **Figure 7. USP29 expression in prostate cancer.**

634 **A, B** Gene expression analysis of *USP29* in a dataset of prostate cancer samples (Taylor et  
635 al, 2010). *USP29* mRNA levels in prostate samples were compared on the basis of their tissue  
636 origin (A) or the Gleason score (GS) of the patient (B) (normal tissue (N): n = 29, primary  
637 tumours (PT): n = 131; metastatic tumours (Met): n = 19).

638 **C** Correlation analysis between *USP29* and *CA9* mRNA levels in the aforementioned dataset  
639 of primary prostate cancer samples (Taylor, n = 131).

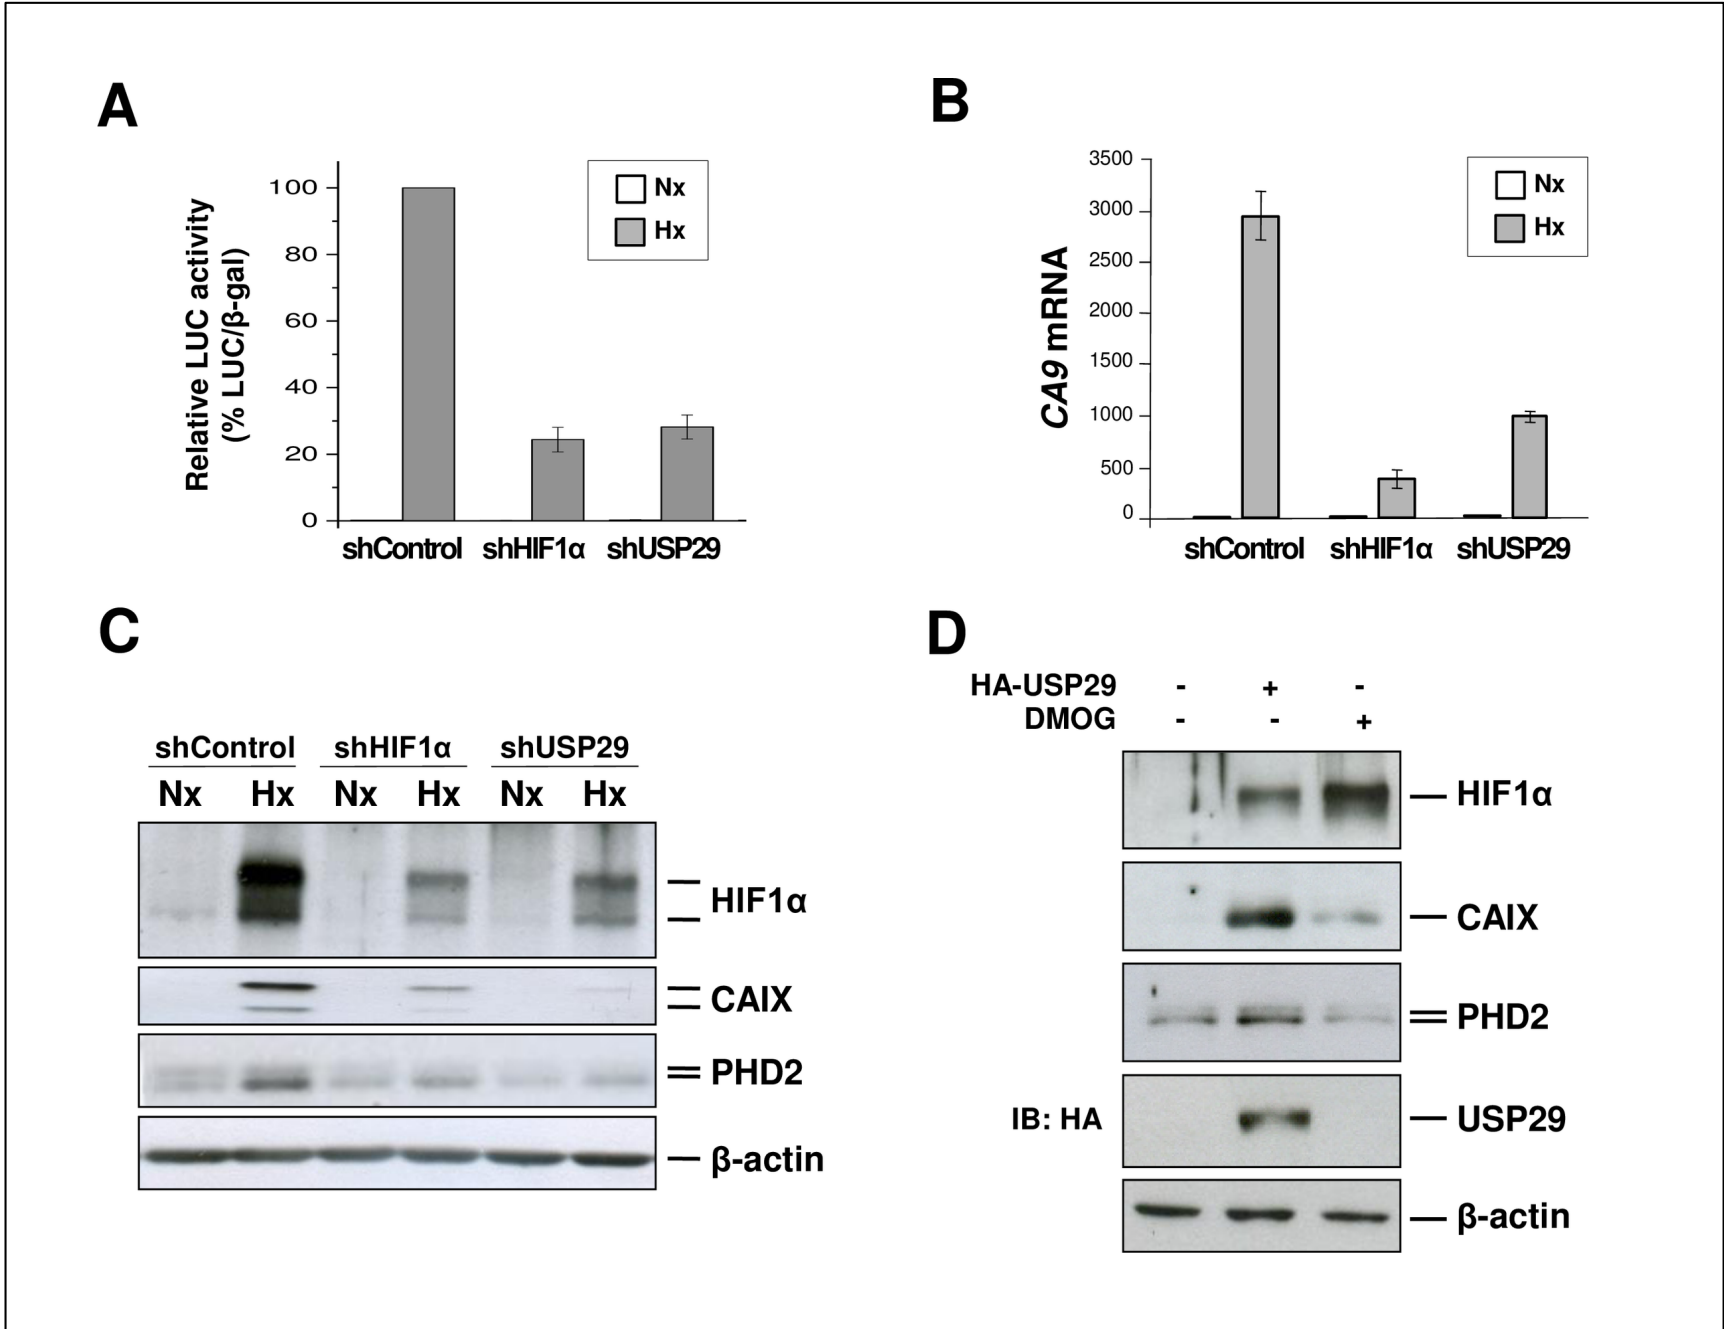

**Figure 1**

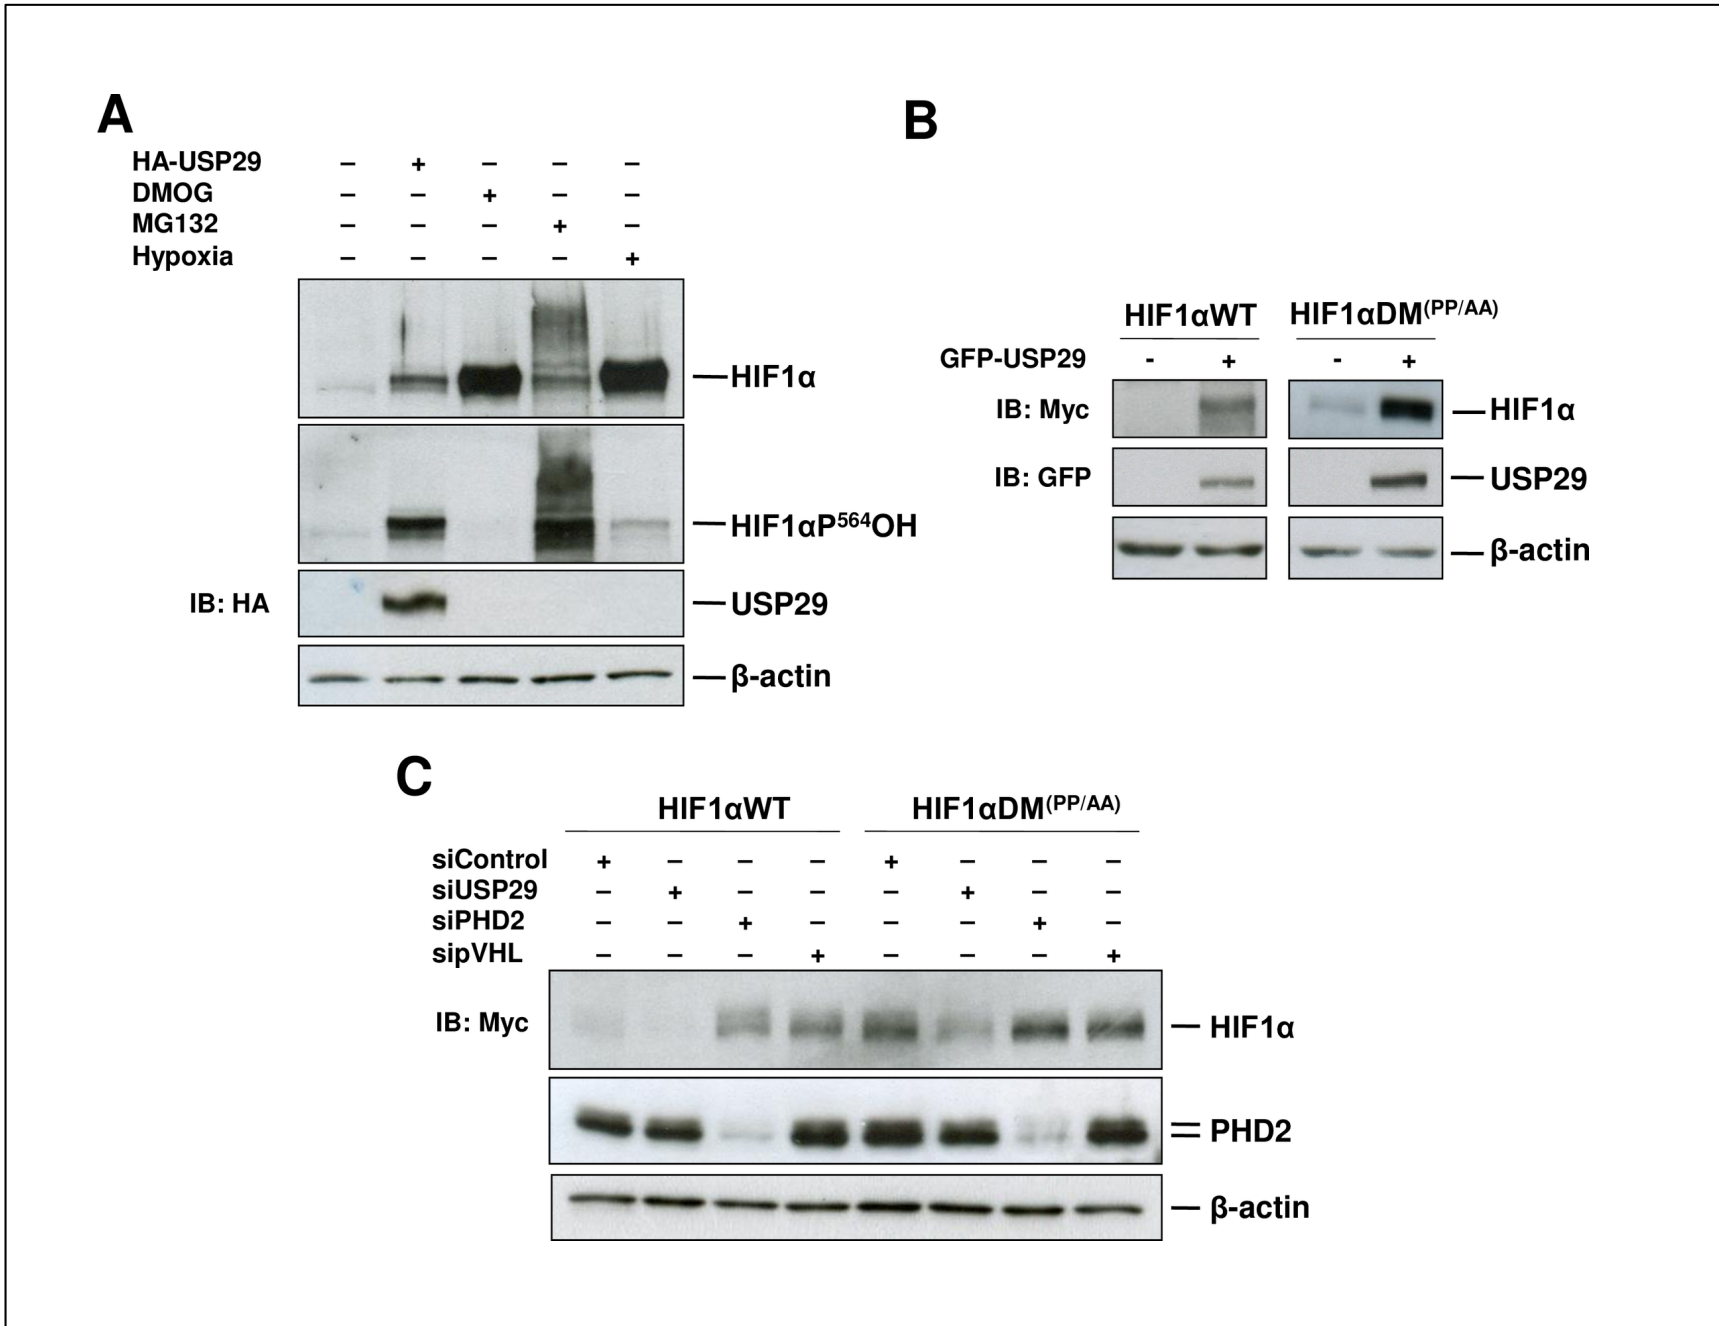

**Figure 2**

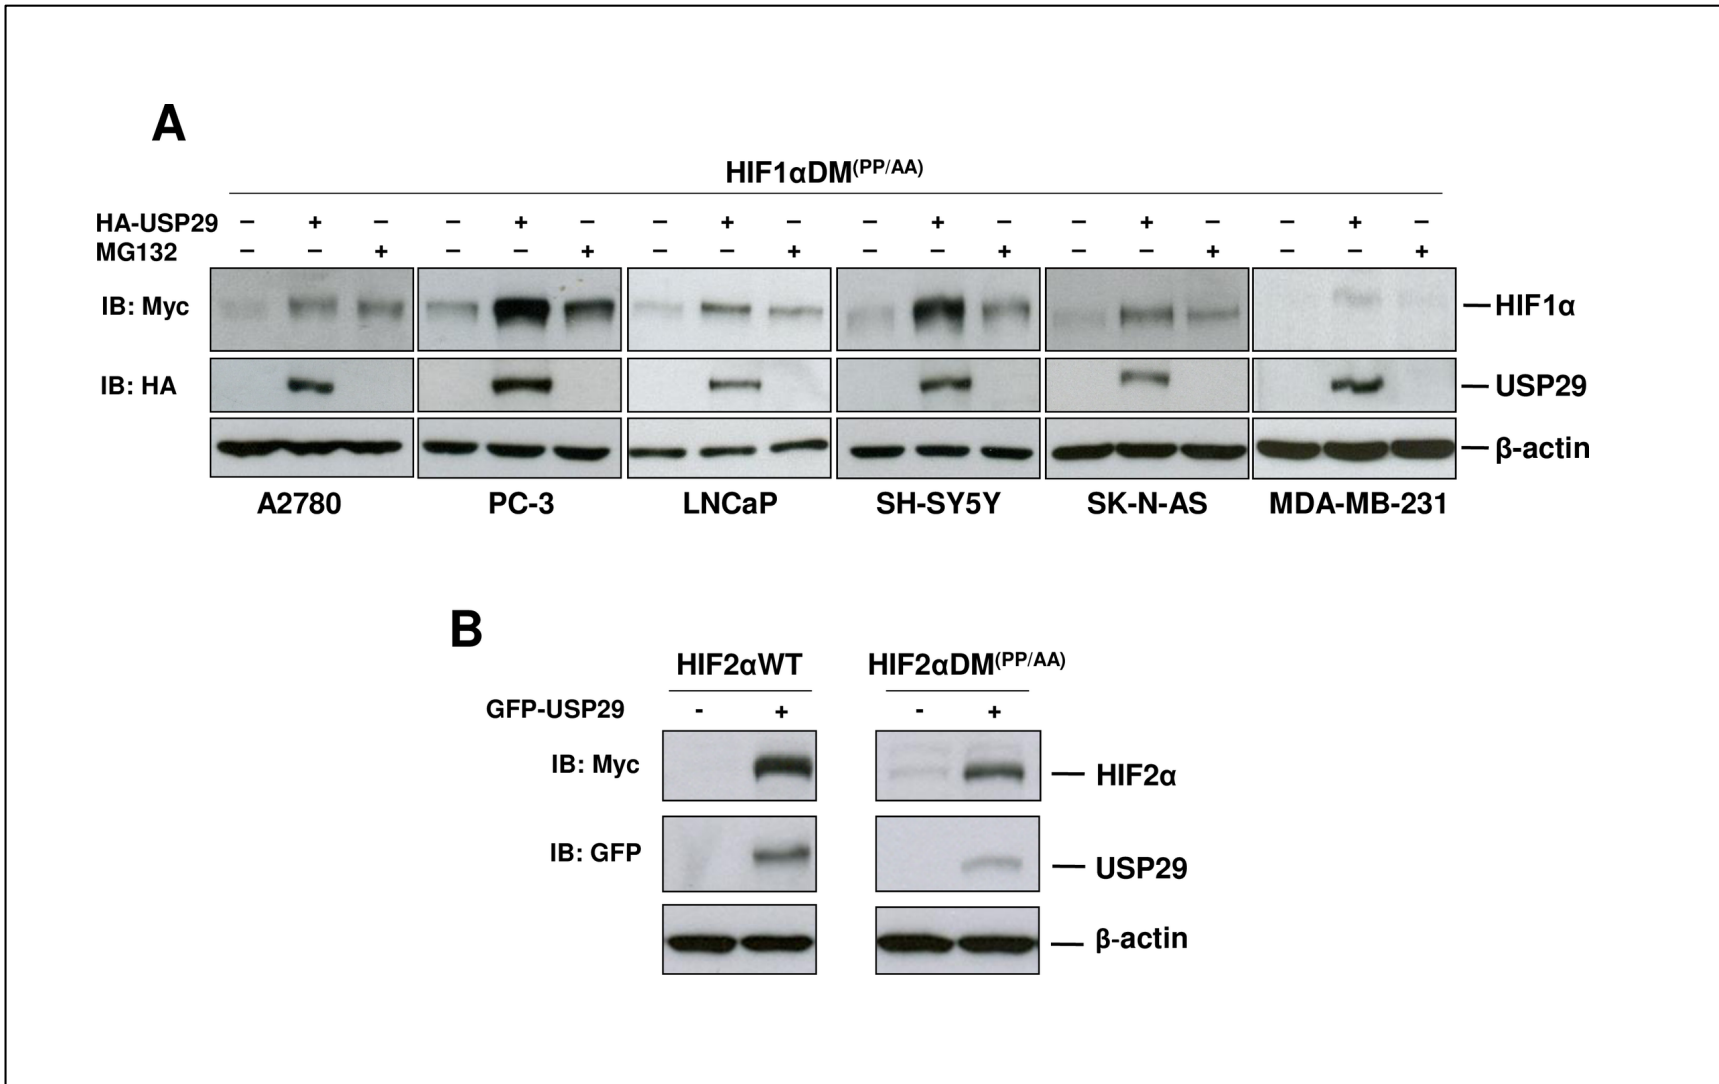

**Figure 3**



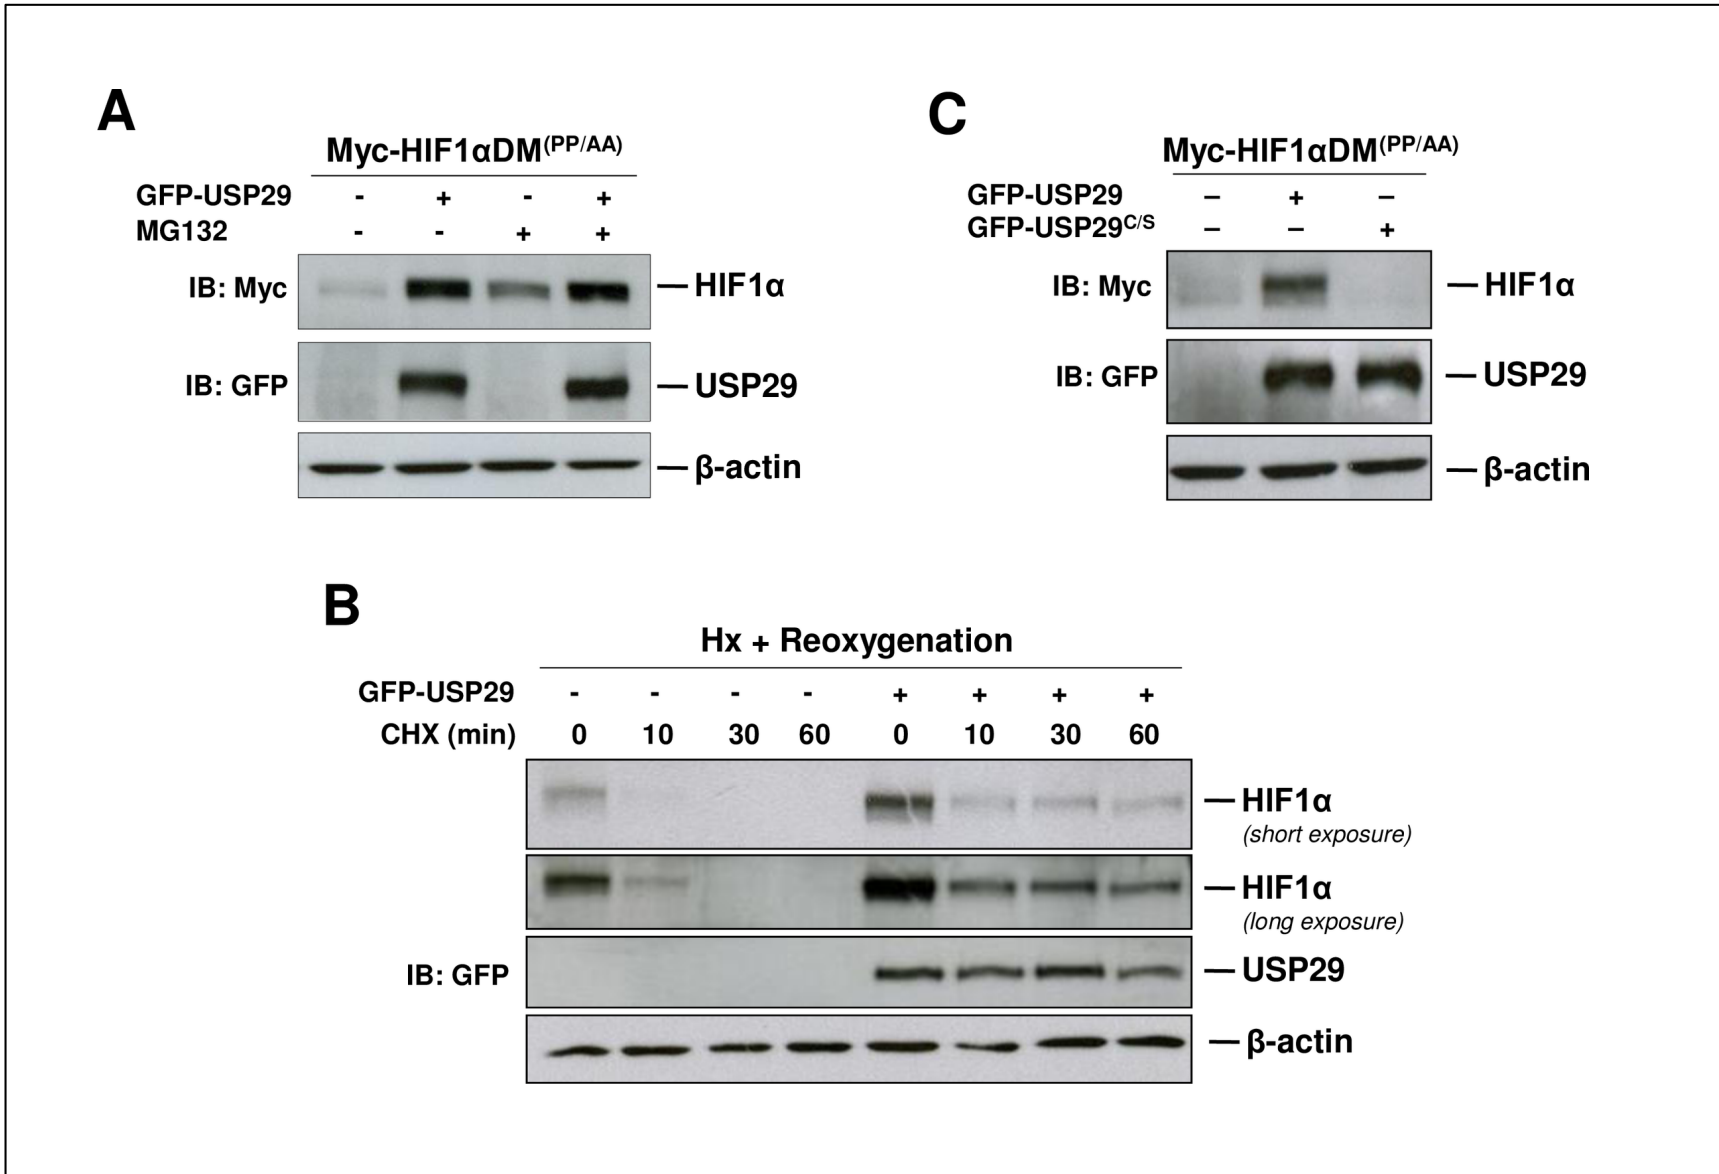

**Figure 4**

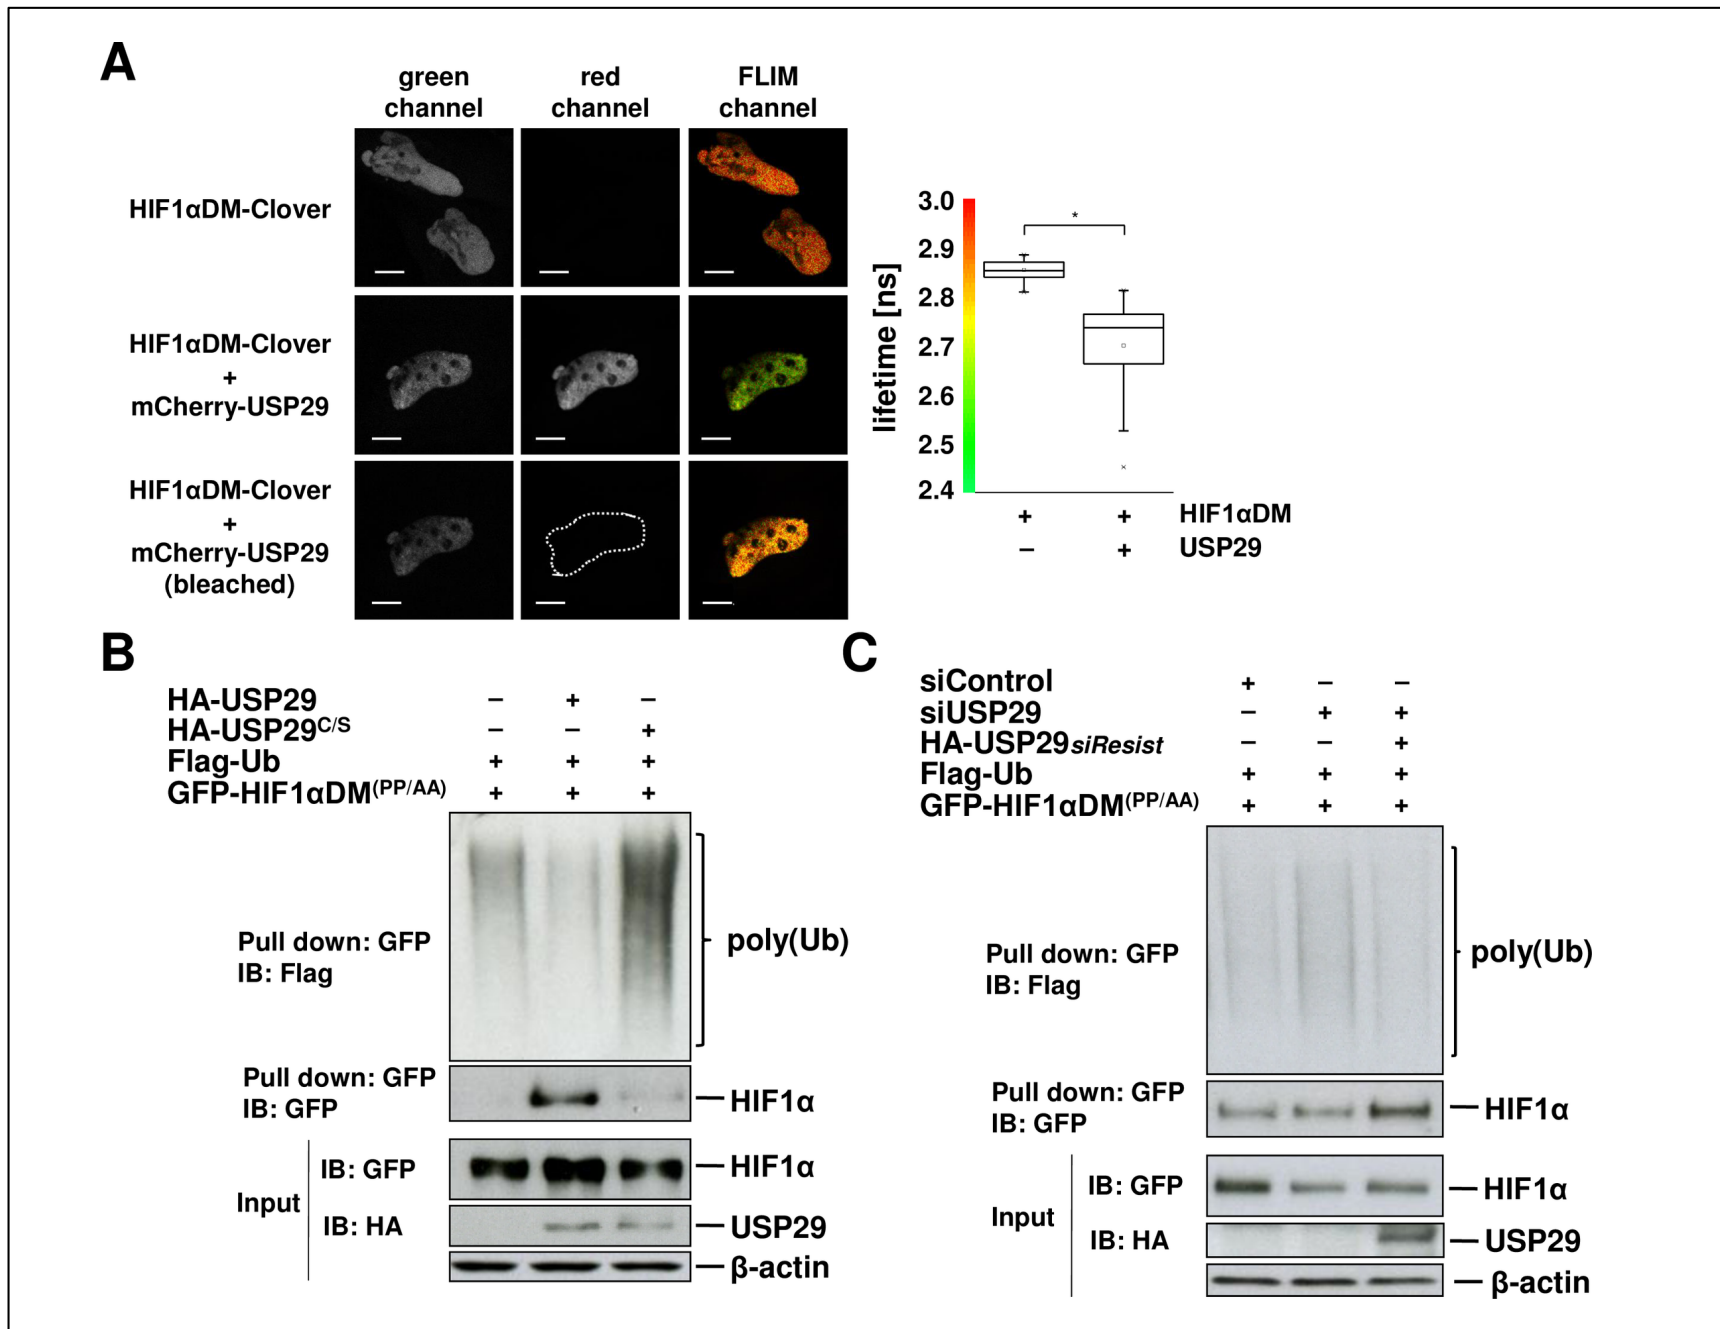

Figure 5

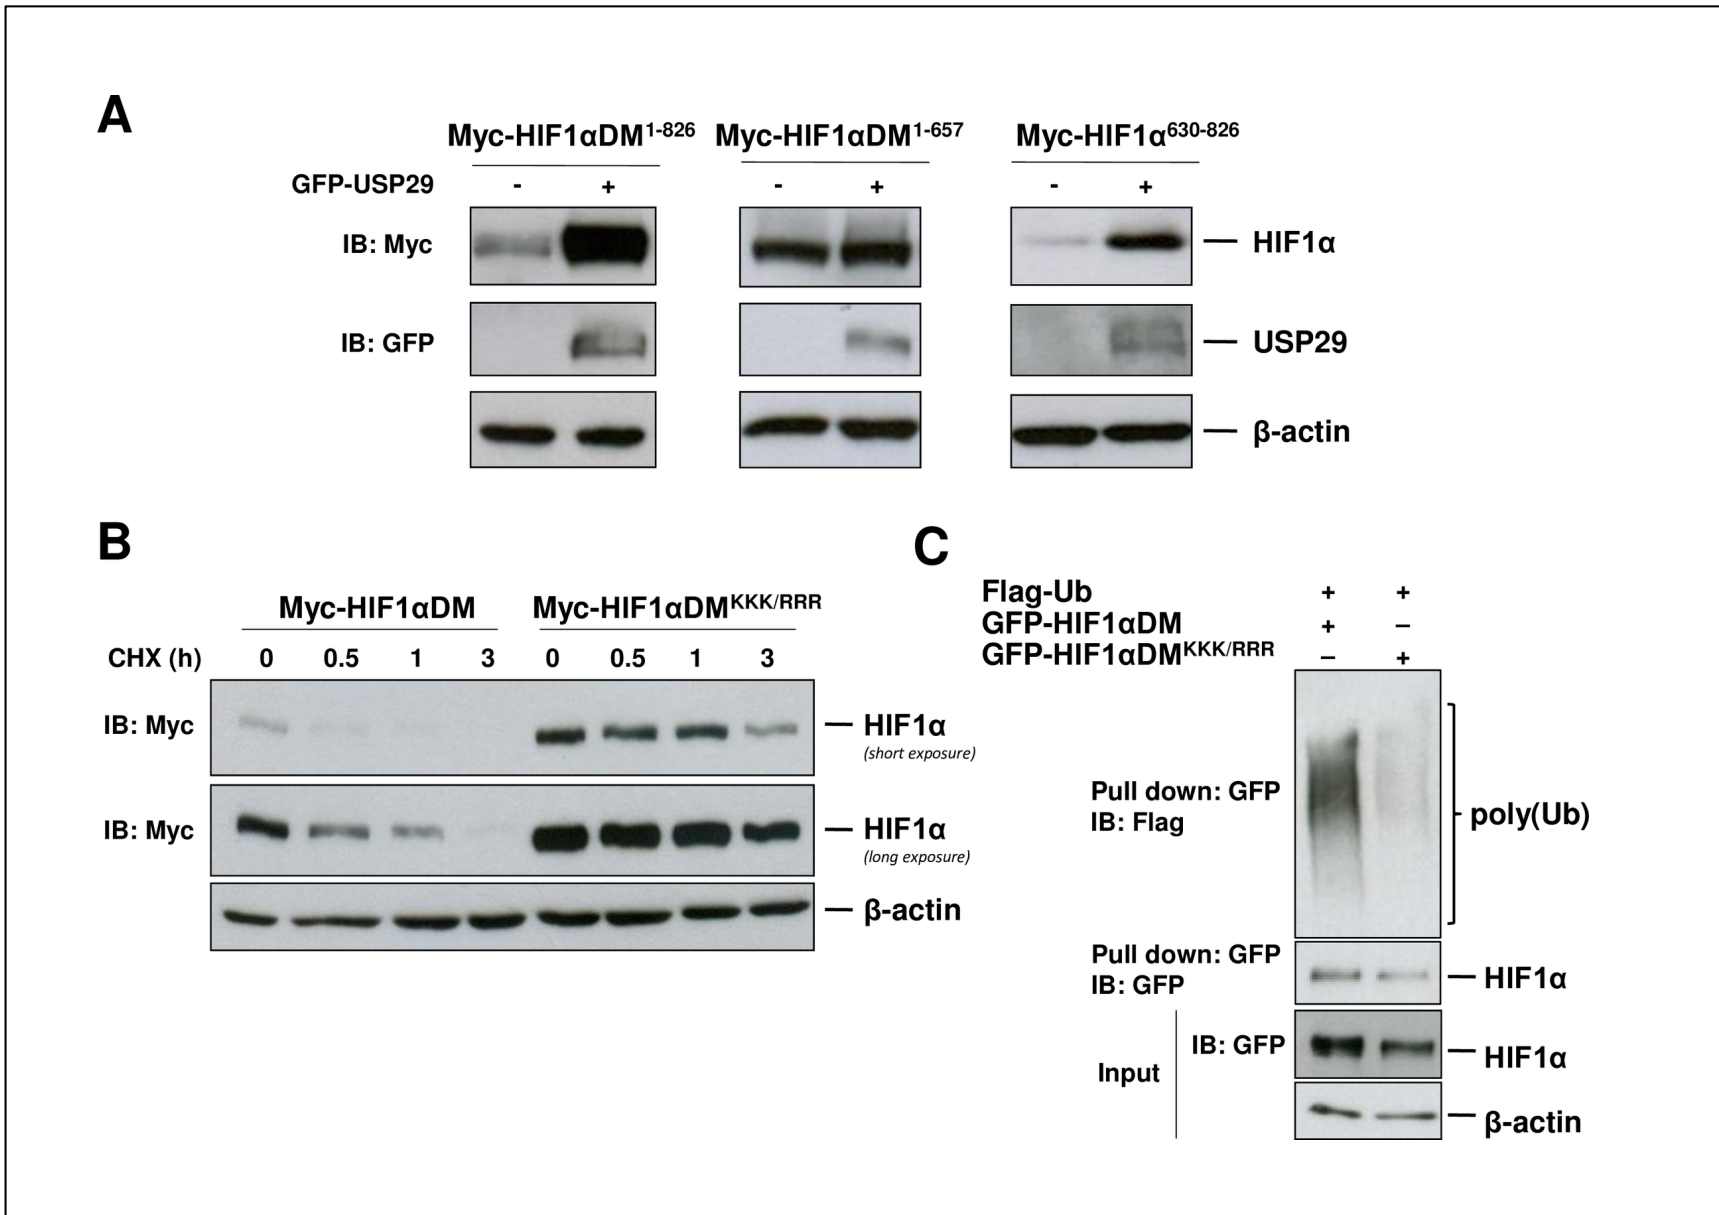

Figure 6

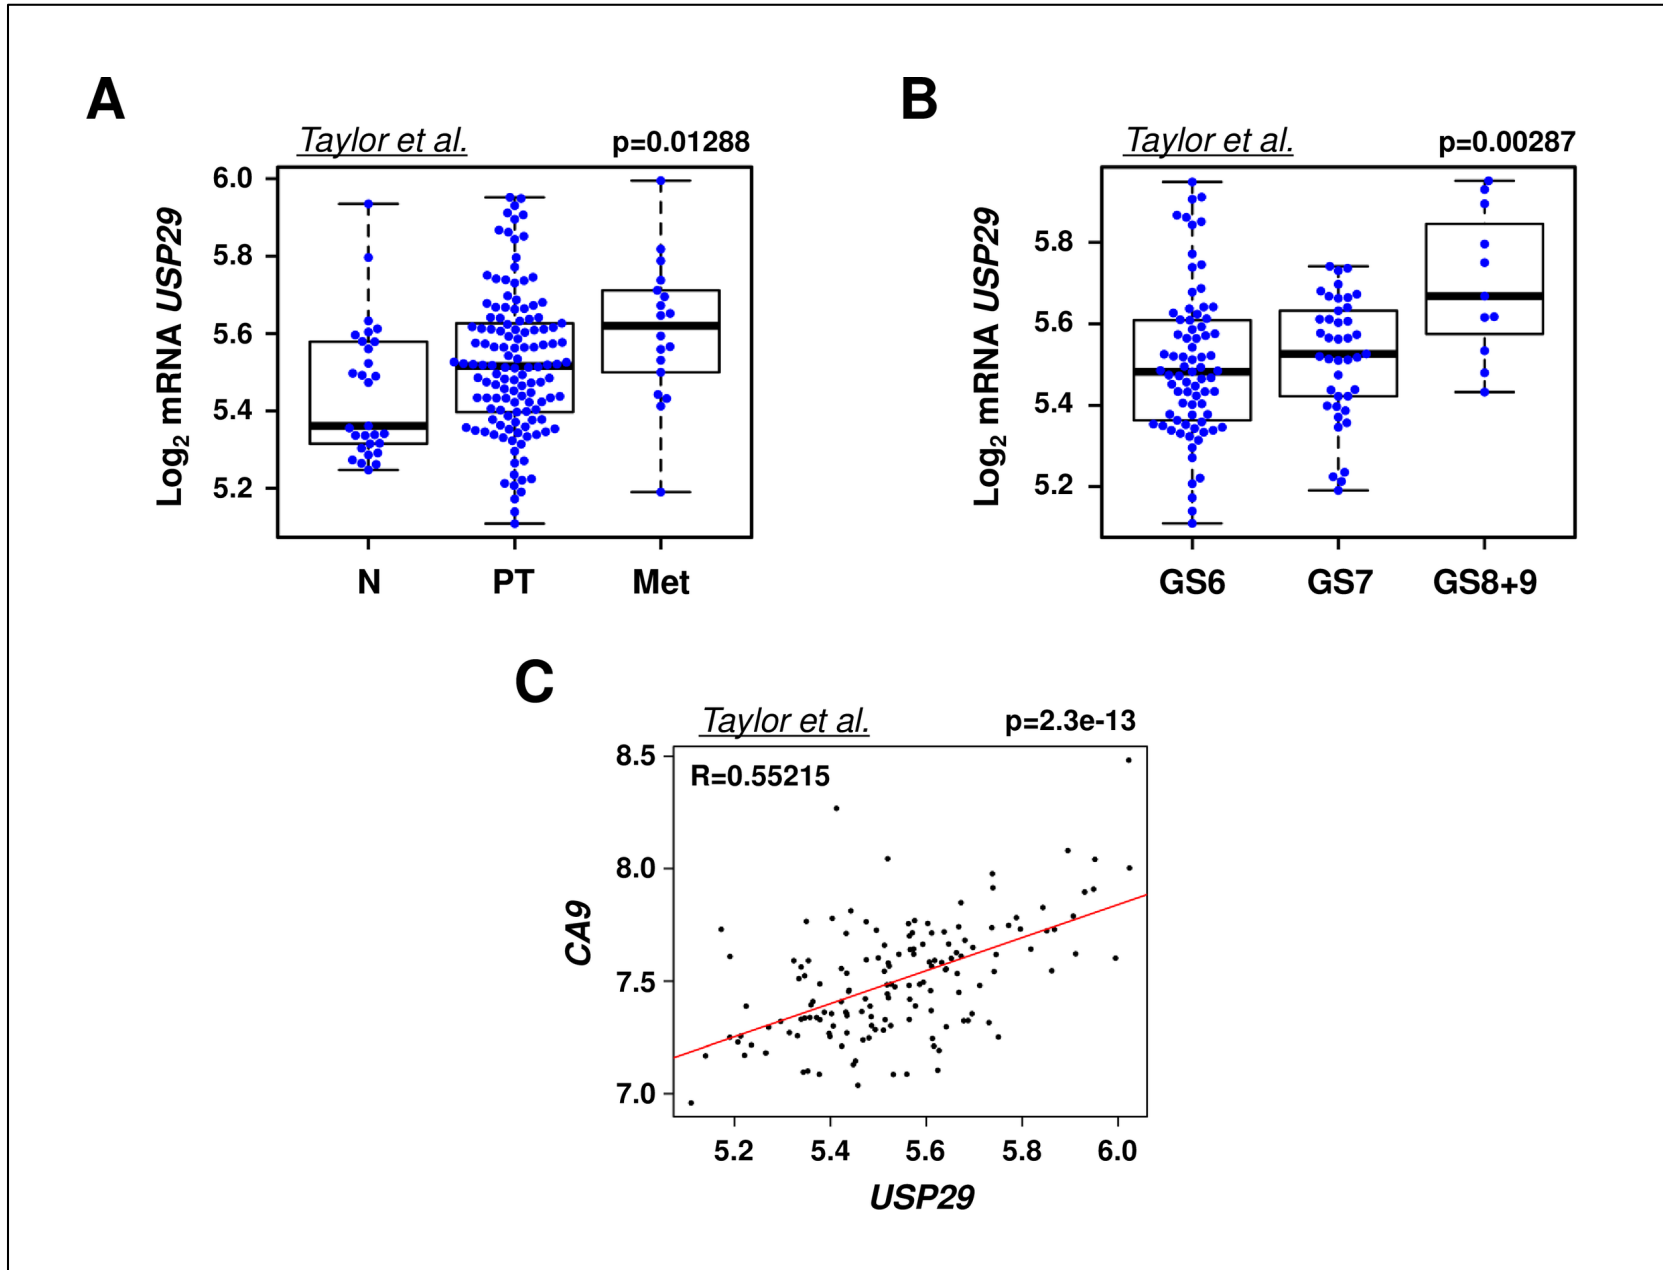

Figure 7
